# Supplementary material
Source: Research Square preprint supplement (doi:10.21203/rs.3.rs-9647356/v1)
Supplement: Supplementary file 1 [file 110c5126c457a98f8efac96c.docx]

Table S1. Multivariable analysis with clinical variables: 14-day mortality and 3-month unfavorable outcome

| Field | Prognostic Variable | Category | 14 Day Death | | 3 Month Unfavorable | |
| --- | --- | --- | --- | --- | --- | --- |
| OR (95% CI) | LR p-value | OR (95% CI) | LR p-value |
| Clinical | Age | Per unit increase | 1.033 (1.024-1.043) | <0.0001 | 1.041 (1.033-1.048) | <0.0001 |
| AIS (vs 3) | 4 | 3.61 (1.89-6.88) | <0.0001 | 2.26 (1.65-3.08) | <0.0001 |
| 5 | 7.65 (4.16-14.09) | 5.00 (3.71-6.73) |
| LOC (vs Alert) | Drowsy | 1.80 (0.85-3.83) | <0.0001 | 2.46 (1.72-3.52) | <0.0001 |
| Stupor | 3.73 (1.81-7.7) | 4.81 (3.25-7.13) |
| Semicoma | 6.94 (3.43-14.07) | 7.48 (4.81-11.64) |
| Coma | 14.27 (6.77-30.09) | 12.03 (5.96-24.28) |
| Pupillary light reflex | Both non-reactive | 4.03 (2.89-5.61) | <0.0001 | 3.74 (2.52-5.53) | <0.0001 |
| Injury cause (vs Fall) | Road traffic accident | 1.36 (1.01-1.84) | 0.0054 | 1.10 (0.85-1.41) | 0.0035 |
| Other non-intentional | 1.20 (0.57-2.54) | 0.42 (0.23-0.76) |
| Unknown | 0.52 (0.29-0.92) | 0.66 (0.4-1.08) |
| Pupil size | Bilateral mydriasis | 2.07 (1.33-3.22) | 0.0011 | NA | NA |
| Manual motor test | Quadriplegia | NA | NA | 3.28 (2.27-4.74) | <0.0001 |
| Reference categories are indicated in the ‘Prognostic Variable’ column as (vs …).  If not indicated as ‘(vs …)’, the reference category is “Absent”.  Variables marked as ‘NA’ in the OR and LR p-value columns were not included in the respective models.  ‘LR p-value’ refers to the likelihood ratio test p-value. AIS = Abbreviated Injury Scale; LOC = Level of Consciousness | | | | | | |

Table S2. Multivariable analysis with clinical variables: 6- and 12-month unfavorable outcome

| Field | Prognostic Variable | Category | 6 Month Unfavorable | | 12 Month Unfavorable | |
| --- | --- | --- | --- | --- | --- | --- |
| OR (95% CI) | LR p-value | OR (95% CI) | LR p-value |
| Clinical | Age | Per unit increase | 1.049 (1.041-1.056) | <0.0001 | 1.046 (1.037-1.055) | <0.0001 |
| AIS (vs 3) | 4 | 2.21 (1.66-2.96) | <0.0001 | 2.04 (1.39-2.98) | <0.0001 |
| 5 | 4.90 (3.71-6.46) | 5.23 (3.66-7.47) |
| LOC (vs Alert) | Drowsy | 2.36 (1.70-3.27) | <0.0001 | 2.36 (1.51-3.68) | <0.0001 |
| Stupor | 4.88 (3.41-6.98) | 4.80 (2.96-7.79) |
| Semicoma | 6.94 (4.61-10.45) | 8.22 (4.87-13.87) |
| Coma | 12.39 (6.53-23.48) | 11.79 (5.39-25.77) |
| Pupillary light reflex | Both non-reactive | 2.99 (2.04-4.36) | <0.0001 | 2.67 (1.72-4.13) | <0.0001 |
| Injury cause (vs Fall) | Road traffic accident | 1.21 (0.96-1.53) | 0.0045 | NA | NA |
| Other non-intentional | 0.68 (0.39-1.18) | NA |
| Unknown | 0.58 (0.37-0.91) | NA |
| Pupil size | Bilateral mydriasis | 3.35 (1.5-7.51) | 0.0015 | 3.36 (1.35-8.40) | 0.0052 |
| Manual motor test | Quadriplegia | 2.62 (1.87-3.66) | <0.0001 | 3.77 (2.51-5.66) | <0.0001 |
| Reference categories are indicated in the ‘Prognostic Variable’ column as (vs …).  If not indicated as ‘(vs …)’, the reference category is “Absent”. Variables marked as ‘NA’ in the OR and LR p-value columns were not included in the respective models.  ‘LR p-value’ refers to the likelihood ratio test p-value. AIS = Abbreviated Injury Scale; LOC = Level of Consciousness | | | | | | |

Table S3. Multivariable analysis with clinical and CT variables: 14-day mortality and 3-month unfavorable outcome

| Field | Prognostic Variable | Category | 14 day death | | 3 Month Unfavorable | |
| --- | --- | --- | --- | --- | --- | --- |
| OR (95% CI) | LR p-value | OR (95% CI) | LR p-value |
| Clinical | Age | Per unit increase | 1.025 (1.016-1.035) | <0.0001 | 1.034 (1.026-1.042) | <0.0001 |
| AIS (vs 3) | 4 | 3.66 (1.91-7.01) | <0.0001 | 1.89 (1.36-2.64) | <0.0001 |
| 5 | 9.03 (4.87-16.74) | 4.63 (3.28-6.54) |
| LOC (vs Alert) | Drowsy | 1.60 (0.75-3.42) | <0.0001 | 1.94 (1.33-2.82) | <0.0001 |
| Stupor | 3.16 (1.52-6.59) | 3.17 (2.09-4.81) |
| Semicoma | 6.01 (2.93-12.33) | 5.26 (3.31-8.38) |
| Coma | 11.61 (5.42-24.86) | 7.86 (3.8-16.25) |
| Pupillary light reflex | Both non-reactive | 3.88 (2.75-5.45) | <0.0001 | 3.81 (2.54-5.70) | <0.0001 |
| Injury cause (vs Fall) | Road traffic accident | 1.30 (0.96-1.77) | 0.0140 | 1.02 (0.79-1.33) | 0.0567 |
| Other non-intentional | 1.33 (0.62-2.85) | 0.49 (0.26-0.91) |
| Unknown | 0.52 (0.29-0.93) | 0.70 (0.42-1.17) |
| Pupil size | Bilateral mydriasis | 1.87 (1.19-2.94) | 0.0065 | NA | NA |
| Manual motor test | Quadriplegia | NA | NA | 2.57 (1.76-3.77) | <0.0001 |
| Image | EDH | Present | 0.36 (0.25-0.51) | <0.0001 | 0.45 (0.34-0.6) | <0.0001 |
| SAH | Present | 2.02 (1.38-2.94) | 0.0002 | 1.67 (1.24-2.25) | 0.0007 |
| Diffuse axonal injury | Present | 0.11 (0.03-0.51) | 0.0002 | NA | NA |
| IVH | Present | NA | NA | 1.49 (1.05-2.10) | 0.0233 |
| Cisternal compresion | Present | NA | NA | 1.92 (1.42-2.60) | <0.0001 |
| Contusion | Present | NA | NA | 1.56 (1.16-2.10) | 0.0033 |
| Midline shift | Present | NA | NA | 1.60 (1.16-2.22) | 0.0044 |
| Reference categories are indicated in the ‘Prognostic Variable’ column as ‘(vs …)’.  If not indicated as ‘(vs …)’, the reference category is “Absent”. Variables marked as ‘NA’ in the OR and LR p-value columns were not included in the respective models.  ‘LR p-value’ refers to the likelihood ratio test p-value. AIS = Abbreviated Injury Scale; LOC = Level of Consciousness; EDH = Epidural Hemorrhage; SAH = Subarachnoid Hemorrhage; IVH = Intraventricular Hemorrhag | | | | | | |

Table S4. Multivariable analysis with clinical and CT variables: 6-month and 12-month unfavorable outcome

| Field | Prognostic Variable | Category | 6 Month Unfavorable | | 12 Month Unfavorable | |
| --- | --- | --- | --- | --- | --- | --- |
| OR (95% CI) | LR p-value | OR (95% CI) | LR p-value |
| Clinical | Age | Per unit increase | 1.043 (1.035-1.050) | <0.0001 | 1.038 (1.028-1.047) | <0.0001 |
| AIS (vs 3) | 4 | 1.93 (1.42-2.63) | <0.0001 | 1.61 (1.07-2.42) | <0.0001 |
| 5 | 4.94 (3.58-6.81) | 4.91 (3.25-7.4) |
| LOC (vs Alert) | Drowsy | 1.90 (1.35-2.67) | <0.0001 | 1.97 (1.23-3.15) | <0.0001 |
| Stupor | 3.49 (2.40-5.09) | 3.68 (2.20-6.14) |
| Semicoma | 5.11 (3.33-7.84) | 6.67 (3.84-11.60) |
| Coma | 8.64 (4.47-16.69) | 8.12 (3.60-18.33) |
| Pupillary light reflex | Both non-reactive | 3.10 (2.11-4.57) | <0.0001 | 2.54 (1.62-3.99) | <0.0001 |
| Injury cause (vs Fall) | Road traffic accident | 1.15 (0.91-1.47) | 0.0756 | NA | NA |
| Other non-intentional | 0.83 (0.47-1.46) | NA |
| Unknown | 0.64 (0.4-1.02) | NA |
| Pupil size | Bilateral mydriasis | 3.37 (1.48-7.69) | 0.0018 | 3.40 (1.32-8.78) | 0.0067 |
| Manual motor test | Quadriplegia | 2.17 (1.54-3.06) | <0.0001 | 2.75 (1.79-4.20) | <0.0001 |
| Image | EDH | Present | 0.47 (0.36-0.61) | <0.0001 | 0.42 (0.30-0.59) | <0.0001 |
| SAH | Present | 1.28 (0.98-1.69) | 0.0742 | 1.56 (1.11-2.19) | 0.0093 |
| IVH | Present | 1.66 (1.22-2.26) | 0.0012 | 1.48 (0.99-2.23) | 0.0575 |
| Cisternal compresion | Present | 1.63 (1.24-2.14) | 0.0004 | 2.92 (2.02-4.22) | <0.0001 |
| Contusion | Present | 1.69 (1.29-2.22) | 0.0002 | NA | NA |
| Midline shift | Present | 1.28 (0.96-1.71) | 0.0911 | 1.69 (1.16-2.46) | 0.0063 |
|  | Facial fracture | Present | NA | NA | 0.73 (0.53-1.00) | 0.0507 |
| Reference categories are indicated in the ‘Prognostic Variable’ column as ‘(vs …)’.  If not indicated as ‘(vs …)’, the reference category is “Absent”. Variables marked as ‘NA’ in the OR and LR p-value columns were not included in the respective models.  ‘LR p-value’ refers to the likelihood ratio test p-value. AIS = Abbreviated Injury Scale; LOC = Level of Consciousness; EDH = Epidural Hemorrhage; SAH = Subarachnoid Hemorrhage; IVH = Intraventricular Hemorrhag | | | | | | |

Table S5. Time-varying characteristics of independent prognostic factors across outcome timepoints in moderate-to-severe traumatic brain injury

| **Domain** | **Prognostic variable** | **14-day death** | **3-month unfav.** | **6-month unfav.** | **12-month unfav.** |
| --- | --- | --- | --- | --- | --- |
| **Clinical** | Age | **●** | **●** | **●** | **●** |
| Head/Neck AIS | **●** | **●** | **●** | **●** |
| Level of consciousness | **●** | **●** | **●** | **●** |
| Pupillary light reflex | **●** | **●** | **●** | **●** |
| Injury cause | **●** | **●** | **●** | – |
| Bilateral mydriasis | **●** | – | **●** | **●** |
| Quadriparesis | – | **●** | **●** | **●** |
| **CT imaging** | EDH | **●** | **●** | **●** | **●** |
| SAH | **●** | **●** | **●** | **●** |
| DAI | **●** | – | – | – |
| IVH | – | **●** | **●** | **●** |
| Cisternal compression | – | **●** | **●** | **●** |
| Midline shift | – | **●** | **●** | – |
| Contusion | – | **●** | **●** | **●** |
| **Laboratory** | aPTT | **●** | **●** | **●** | **●** |
| CRP | **●** | **●** | **●** | **●** |
| Sodium | **●** | **●** | **●** | – |
| Platelet count | **●** | – | – | – |
| AST | **●** | – | – | – |
| ALP | – | **●** | **●** | **●** |
| BUN | – | – | **●** | **●** |
| Albumin | – | – | **●** | – |

● indicates statistically significant independent association in multivariable analysis (p < 0.10); – indicates not significant or not retained in the final model. Unfav. = unfavorable functional outcome (Glasgow Outcome Scale–Extended ≤4). All associations are based on adjusted odds ratios from restricted cubic spline logistic regression models. Abbreviations: AIS, Abbreviated Injury Scale; aPTT, activated partial thromboplastin time; AST, aspartate aminotransferase; ALP, alkaline phosphatase; BUN, blood urea nitrogen; CRP, C-reactive protein; DAI, diffuse axonal injury; EDH, epidural hematoma; IVH, intraventricular hemorrhage; SAH, subarachnoid hemorrhage.

|  | Overall cohort (n=3108) | 14-day death cohort (n=2889) | 6-month unfavorable outcome cohort (n=2722) |
| --- | --- | --- | --- |
| Age, mean (SD) | 55.2 ± 19.0 | 55.5 ± 19.1 | 55.8 ± 19.2 |
| < 65 | 2042 (65.7%) | 1887 (65.3%) | 1760 (64.7%) |
| ≥ 65 | 1066 (34.3%) | 1002 (34.7%) | 962 (35.3%) |
| Hours since injury, mean (SD) | 2.0 ± 2.1 | 2.0 ± 2.1 | 2.1 ± 2.2 |
| < 1 | 1221 (39.3%) | 1127 (39.0%) | 1052 (38.6%) |
| 1–3 | 1302 (41.9%) | 1218 (42.2%) | 1145 (42.1%) |
| > 3 | 585 (18.8%) | 544 (18.8%) | 525 (19.3%) |
| GCS, mean (SD) | 10.8 ± 4.2 | 10.7 ± 4.2 | 10.6 ± 4.3 |
| Mild (≥13) | 1615 (52.0%) | 1485 (51.4%) | 1378 (50.6%) |
| Moderate (9–12) | 463 (14.9%) | 432 (15.0%) | 414 (15.2%) |
| Severe (≤8) | 1030 (33.1%) | 972 (33.6%) | 930 (34.2%) |
| Head/neck AIS, mean (SD) | 4.0 ± 0.9 | 4.0 ± 0.9 | 4.1 ± 0.9 |
| 3 | 1086 (34.9%) | 995 (34.4%) | 923 (33.9%) |
| 4 | 813 (26.2%) | 757 (26.2%) | 714 (26.2%) |
| 5 | 1209 (38.9%) | 1137 (39.4%) | 1085 (39.9%) |
| Pupil Reactivity |  |  |  |
| Both reactive | 2481 (79.8%) | 2289 (79.2%) | 2138 (78.5%) |
| One reactive | 156 (5.0%) | 146 (5.1%) | 141 (5.2%) |
| Both non-reactive | 471 (15.2%) | 454 (15.7%) | 443 (16.3%) |
| Epidural hemorrhage |  |  |  |
| Present | 931 (30.0%) | 848 (29.4%) | 792 (29.1%) |
| Absent | 2177 (70.0%) | 2041 (70.6%) | 1930 (70.9%) |
| Subarachnoid hemorrhage |  |  |  |
| Present | 2027 (65.2%) | 1887 (65.3%) | 1788 (65.7%) |
| Absent | 1081 (34.8%) | 1002 (34.7%) | 934 (34.3%) |
| Number of excluded patients by any missing lab variables | 0 | 89 | 89 |
| Number of excluded patients by missing outcome | 0 | 130 | 297 |
| Values are number (%) except indicated otherwise. ‘n’ refers to number of patients. SD: standard deviation, GCS: Glasgow Coma Scale, AIS: Abbreviated Injury Score | | | |

Table S6. Comparison of cohorts and missingness
