# Supplementary material
Source: Research Square preprint supplement (doi:10.21203/rs.3.rs-9647356/v1)
Supplement: Supplementary file 2 [file 36bafcb6beede11038d0a5f7.docx]

**TRIPOD Checklist**

*Transparent Reporting of a multivariable prediction model for Individual Prognosis Or Diagnosis*

**Type: Development + External Validation**

| **Item** | **TRIPOD Checklist Item** | **Location in Manuscript** |
| --- | --- | --- |
| **TITLE AND ABSTRACT** | | |
| **1** | Identify the study as developing and/or validating a multivariable prediction model, the target population, and the outcome to be predicted. | Title: “Time-Specific Prognostic Models for Moderate-to-Severe Traumatic Brain Injury: External Validation and Clinical Utility Compared with IMPACT in the CENTER-TBI Cohort” — identifies development + external validation, target population (msTBI), outcomes (14-day mortality and 3-/6-/12-month unfavorable functional outcome), and direct head-to-head comparison with the IMPACT benchmark. |
| **2** | Provide a summary of objectives, study design, setting, participants, sample size, predictors, outcome, statistical analysis, results, and conclusions. | Abstract (Background/Objective, Methods, Results, Conclusions): all elements included; 297 words within 300-word limit. |
| **INTRODUCTION** | | |
| **3a** | Explain the medical context (including whether diagnostic or prognostic) and rationale for developing or validating the multivariable prediction model, including references to existing models. | Introduction, ¶1–2: Describes TBI burden, gap in existing CRASH/IMPACT models (single-timepoint, linear assumptions, Western cohorts, calibration drift), and rationale for multi-timepoint, spline-augmented approach. |
| **3b** | Specify the objectives, including whether the study describes the development or validation of the model or both. | Introduction, ¶3: “…we retrospectively analyzed…to: (1) comprehensively identify independent prognostic factors…and (2) develop spline-based, non-linear logistic models…with a particular emphasis on strong external validation.” |
| **METHODS** | | |
| **4a** | Describe the study design or source of data (e.g., randomized trial, cohort, or registry data), separately for the development and validation data sets, if applicable. | Methods, Patients: Retrospective analysis of prospectively collected single-center trauma registry (AJOU, 2011–2024) for development; CENTER-TBI multicenter European cohort for external validation. |
| **4b** | Specify the key study dates, including start of accrual; end of accrual; and, if applicable, end of follow-up. | Methods, Patients: Development cohort 2011–2024. Follow-up at 14 days, 3, 6, 12 months (±30 days). CENTER-TBI dates described in original CENTER-TBI publications (referenced). |
| **5a** | Specify key elements of the study setting (e.g., primary care, secondary care, general population) including number and location of centres. | Methods, Patients: “Ajou University Hospital (Suwon, Republic of Korea) is a government-designated regional trauma center (functionally equivalent to a U.S. Level I trauma center)”; CENTER-TBI = European multicenter study. |
| **5b** | Describe eligibility criteria for participants. | Methods, Patients: (1) injury-to-admission ≤12 h, (2) head/neck AIS ≥3, (3) age ≥18 years, (4) known injury mechanism. Exclusions: prior TBI, pre-existing neurological disability, readmission/transfer. |
| **5c** | Give details of treatments received, if relevant. | Not specifically described (observational prognostic study; all patients received standard trauma care at a Level I center). Limitation acknowledged in Discussion. |
| **6a** | Clearly define the outcome that is predicted by the prediction model, including how and when assessed. | Methods, Predictors and Outcomes: “Outcomes were 14-day death and unfavorable functional outcome at 3, 6, and 12 months post-injury, defined as GOSE ≤4. GOSE was assessed at each scheduled follow-up time point (±30 days).” In-person or structured telephone interview described. |
| **6b** | Report any actions to blind assessment of the outcome to be predicted. | Methods, Predictors and Outcomes: “Assessors were not blinded to baseline predictors, as GOSE evaluation was performed as part of routine clinical follow-up.” |
| **7a** | Clearly define all predictors used in developing or validating the multivariable prediction model, including how and when they were measured. | Methods, Predictors and Outcomes: 22 clinical, 12 CT, 30 laboratory variables listed in detail. All captured at admission (≤24 h). Additional file 6: complete model specifications including coefficients, knot locations. |
| **7b** | Report any actions to blind assessment of predictors for the outcome and other predictors. | Not applicable (retrospective registry data; predictors recorded as part of routine clinical care prior to outcome assessment). |
| **8** | Explain how the study size was arrived at. | Methods, Patients + Transparency section: “Sample size was determined by data availability: from 4,461 registry records, 3,108 met eligibility criteria and complete-case analysis yielded 3,019 patients.” EPV 10.66–24.11 reported in Performance section. |
| **9** | Describe how missing data were handled (e.g., complete-case analysis, single imputation, multiple imputation) with details of any imputation method. | Methods, Patients: Complete-case analysis; 89/3,108 (2.9%) excluded for missing lab values. Comparison of included vs excluded patients in Additional file 1: Table S6. |
| **10a** | Describe how predictors were handled in the analyses. | Methods, Statistical Analysis: Continuous predictors assessed for nonlinearity via LR tests; restricted cubic splines (4 knots) when supported. Categorical variables described (levels in Additional file 6). Correlation screening (Pearson r, η², Cramér’s V), VIF<10. |
| **10b** | Specify type of model, all model-building procedures (including any predictor selection), and method for internal validation. | Methods, Statistical Analysis: Backward stepwise logistic regression (exit p≥0.10). Three model families (Clinical/CT/Full). Ridge, lasso, elastic-net penalization across λ/α grid. Internal validation: random 4:1 train–validation split preserving event rates, with final models refit on the full development cohort. Apparent and held-out test performance closely matched, suggesting limited overfitting. Optimism-corrected bootstrap internal validation is acknowledged as a methodological refinement reserved for future revision (Limitations item 7). |
| **10c** | For validation, describe how the predictions were calculated. | Methods, Statistical Analysis: AJOU-Adapted models created by excluding/replacing unavailable variables with GCS measures. Applied to CENTER-TBI with harmonized predictors. 1,000 bootstrap resamples for CI estimation. |
| **10d** | Specify all measures used to assess model performance and, if relevant, to compare multiple models. | Methods, Performance: AUROC (discrimination), calibration plot with slope and intercept, Brier score. Pairwise DeLong tests with 95% confidence intervals for AUROC comparisons against IMPACT-core/-extended/-lab. Decision curve analysis (Vickers and Elkin, Med Decis Making 2006) with net benefit and bootstrap 95% confidence intervals across threshold probabilities. EPV ratio for overfitting assessment. |
| **11** | Provide details on how risk groups were created, if done. | Risk groups were not created; models provide continuous predicted probabilities. Calibration plots use decile-based risk grouping for visualization (Figures 3–4). |
| **12** | For validation, identify any differences from the development data in setting, eligibility criteria, outcome, and predictors. | Methods, Statistical Analysis + Results, Baseline Characteristics (Table 1): CENTER-TBI vs AJOU differences described (ISS 27.7 vs 21.6; lower event rates in CENTER-TBI). Variable mismatches described: level of consciousness and quadriparesis unavailable → AJOU-Adapted models created. |
| **RESULTS** | | |
| **13a** | Describe the flow of participants through the study, including the number of participants with and without the outcome and, if applicable, a summary of the follow-up time. A diagram may be helpful. | Figure 1: Flow diagram (4,461 → 3,108 → 3,019). Results, Baseline Characteristics: event rates reported (14-day mortality 12.9%; unfavorable outcomes 41.7%/38.1%/39.4% at 3/6/12 months). Endpoint-specific n for external validation stated. |
| **13b** | Describe the characteristics of the participants (including demographic, clinical features, and available predictors), including the number of participants with missing data for predictors and outcome. | Table 1: Baseline characteristics of AJOU and CENTER-TBI cohorts. Missing data: 89/3,108 (2.9%) excluded; details in Additional file 1: Table S6. External-validation pool n=1,155 with endpoint-specific analytic samples n=974–1,040 reported in Methods. |
| **13c** | For validation, show a comparison with the development data of the distribution of important variables (demographics, predictors and outcome). | Table 1: Side-by-side comparison of AJOU vs CENTER-TBI demographics, injury characteristics, GCS, AIS, ISS, and outcome rates. |
| **14a** | Specify the number of participants and outcome events in each analysis. | Methods/Results: Development n=3,019; external validation pool n=1,155 with endpoint-specific analytic samples n=1,040 (14-day), n=974 (3-month), n=984 (6-month), n=985 (12-month). Event counts derivable from rates in Table 1. IMPACT benchmark comparison performed in the same analytic samples. |
| **14b** | If done, report the unadjusted association between each candidate predictor and outcome. | Additional file 3: Tables S10–S12 (univariable logistic regression results for all candidate predictors by endpoint). |
| **15a** | Present the full prediction model to allow predictions for individuals (i.e., all regression coefficients, and model intercept or baseline survival at a given time point). | Additional file 6: Complete model specifications including all coefficients, categorical encodings, and spline knot locations. Web calculator at GitHub URL. |
| **15b** | Explain how to use the prediction model. | Figure 5: Screenshot and legend of web calculator. Legend explains: select outcome → select data availability → enter variables → display predicted probability. |
| **16** | Report performance measures (with CIs) for the prediction model. | Tables 3–6: AUROC, calibration slope, and calibration intercept for each model/timepoint (internal + external). Table 7: Time-varying coefficient comparison across endpoints. Table 8: Pairwise DeLong tests of AUROC differences between AJOU-Adapted and IMPACT models, with point estimates, 95% confidence intervals, ΔAUROC, z-statistics, and p-values. Figures 3–4: Calibration plots. Figure 5: Decision curve analysis (net benefit) with bootstrap 95% confidence intervals at each threshold (1,000 resamples). Optimism-corrected bootstrap internal validation is acknowledged as a methodological refinement for future revision (Limitations item 7). |
| **17** | If done, report the results from any model updating (i.e., model specification, model performance). | Not done (no recalibration or updating of IMPACT models was performed; AJOU models presented as newly developed models). |
| **DISCUSSION** | | |
| **18** | Discuss any limitations of the study (such as nonrepresentative sample, few events per variable, missing data). | Discussion, Limitations and Future Directions: 5 limitations addressed: (1) single-center, (2) relatively small external dataset, (3) AJOU-Base models not externally testable, (4) GOSE dichotomization, (5) CT representation and modeling scope. |
| **19a** | For validation, discuss the results with reference to performance in the development data, and any other validation data. | Discussion, ¶5–10: External performance discussed relative to internal validation and relative to IMPACT models; transportability across East Asian→European populations highlighted; calibration drift of legacy models discussed. |
| **19b** | Give an overall interpretation of the results, considering objectives, limitations, results from similar studies, and other relevant evidence. | Discussion, ¶1–11 + Conclusions: Contextualizes within CRASH/IMPACT literature; emphasizes multi-timepoint, spline-augmented approach; time-varying prognostic patterns; clinical implications for bedside decision-making. |
| **20** | Discuss the potential clinical use of the model and implications for future research. | Discussion, ¶ “From a clinical perspective…”: Tiered models for progressive data availability; multi-timepoint for different clinical needs (acute management vs rehabilitation planning); web calculator for implementation. Future directions: multicenter validation, raw CT/CNN, ordinal GOSE. |
| **OTHER INFORMATION** | | |
| **21** | Provide information about the availability of supplementary resources, such as study protocol, web calculator, and data sets. | Web calculator: GitHub URL (Methods + Figure 5). Supplementary tables: Additional files 1–6. Data: available from corresponding author on reasonable request. Model specifications: Additional file 6. |
| **22** | Give the source of funding and the role of the funders for the present study. | Funding statement: NRF grant RS-2023-00253964 and Technology Innovation Program RS-2025-02221011 (MOTIE). Funder role not explicitly stated (standard for retrospective registry studies). |

*Reference: Collins GS, Reitsma JB, Altman DG, Moons KGM. Transparent reporting of a multivariable prediction model for individual prognosis or diagnosis (TRIPOD): the TRIPOD statement. BMJ. 2015;350:g7594.*
