# Supplementary material
Source: Research Square preprint supplement (doi:10.21203/rs.3.rs-9647356/v1)
Supplement: Supplementary file 3 [file 3aff1be5954c7b30f43c2546.docx]

| Characteristics | AJOU (n=3019) | CENTER (n=1155) |
| --- | --- | --- |
| Sex |  |  |
| Males | 2294 (76.0%) | 824 (71.3%) |
| Females | 725 (24.0%) | 331 (28.7%) |
| Age, mean (SD) | 55.9 ± 17.9 | 51.3 ± 19.4 |
| 18 - 39 | 648 (21.4%) | 358 (31.0%) |
| 40 - 64 | 1340 (44.4%) | 461 (39.9%) |
| 65 - | 1031 (34.2%) | 336 (29.1%) |
| Hours since injury, mean (SD) | 2.1 ± 2.1 | 2.1 ± 2.0 |
| < 1 | 1460 (48.4%) | 389 (33.7%) |
| 1 – 3 | 949 (31.4%) | 543 (47.0%) |
| > 3 | 610 (20.2%) | 223 (19.3%) |
| Cause of injury |  |  |
| Road traffic accident | 1205 (39.9%) | 458 (39.7%) |
| Incidental fall | 1423 (47.1%) | 508 (44.0%) |
| Other | 391 (13.0%) | 189 (16.4%) |
| GCS, mean (SD) | 10.6 ± 4.4 | 10.7 ± 4.7 |
| mild (≥13) | 1550 (51.3%) | 615 (53.2%) |
| moderate (9-12) | 406 (13.4%) | 146 (12.6%) |
| severe (≤8) | 1063 (35.2%) | 394 (34.1%) |
| Head/neck AIS, mean (SD) | 3.9 ± 1.0 | 3.7 ± 0.8 |
| 3 | 1154 (38.3%) | 604 (52.3%) |
| 4 | 729 (24.1%) | 278 (24.1%) |
| 5 | 1136 (37.6%) | 273 (23.6%) |
| ISS, mean (SD) | 21.6 ± 10.7 | 27.7 ± 15.6 |
| 14 day Death | n = 2889 | n = 1040 |
| Survived | 2516 (87.1%) | 918 (88.3%) |
| Death | 373 (12.9%) | 122 (11.7%) |
| Unfavorable outcome at 3 month | n = 2310 | n = 974 |
| Favorable (GOSE≥5) | 1347 (58.3%) | 574 (58.9%) |
| Unfavorable (GOSE≤4) | 963 (41.7%) | 400 (41.1%) |
| Unfavorable outcome at 6 month | n = 2722 | n = 984 |
| Favorable (GOSE≥5) | 1685 (61.9%) | 650 (66.1%) |
| Unfavorable (GOSE≤4) | 1037 (38.1%) | 334 (33.9%) |
| Unfavorable outcome at 12 month | n = 1827 | n = 985 |
| Favorable (GOSE≥5) | 1107 (60.6%) | 673 (68.3%) |
| Unfavorable (GOSE≤4) | 720 (39.4%) | 312 (31.7%) |
| Values are number (%) except indicated otherwise. ‘n’ refers to number of patients. SD: standard deviation, GCS: Glasgow Coma Scale, AIS: Abbreviated Injury Score, ISS: Injury Severity Score, GOSE: Glasgow Outcome Scale Extended | | |

Table 1. General characteristics of study population and CENTER dataset.

Table 2. Multivariable analysis with clinical, CT and laboratory variables: 14-day mortality and 3-month unfavorable outcome

| Field | Prognostic Variable | Category | 14 day death | | 3 Month Unfavorable | | 6 Month Unfavorable | | 12 Month Unfavorable | |
| --- | --- | --- | --- | --- | --- | --- | --- | --- | --- | --- |
| OR (95% CI) | LR p-value | OR (95% CI) | LR p-value | OR (95% CI) | LR p-value | OR (95% CI) | LR p-value |
| Clinical | Age | Per unit increase | 1.028 (1.017-1.039) | <0.0001 | 1.033 (1.025-1.042) | <0.0001 | 1.037 (1.029-1.046) | <0.0001 | 1.035 (1.024-1.045) | <0.0001 |
| AIS (vs 3) | 4 | 2.75 (1.40-5.43) | <0.0001 | 1.78 (1.26-2.51) | <0.0001 | 1.87 (1.36-2.59) | <0.0001 | 1.51 (0.98-2.33) | <0.0001 |
| 5 | 7.32 (3.86-13.86) | 4.12 (2.87-5.93) | 4.88 (3.46-6.87) | 4.24 (2.72-6.61) |
| LOC (vs Alert) | Drowsy | 1.50 (0.69-3.27) | <0.0001 | 2.02 (1.36-2.98) | <0.0001 | 2.01 (1.40-2.88) | <0.0001 | 1.88 (1.14-3.08) | <0.0001 |
| Stupor | 2.96 (1.37-6.39) | 3.30 (2.12-5.16) | 3.85 (2.57-5.77) | 3.29 (1.89-5.73) |
| Semicoma | 5.49 (2.57-11.71) | 5.10 (3.10-8.40) | 4.91 (3.08-7.84) | 5.51 (3.02-10.06) |
| Coma | 8.16 (3.59-18.54) | 5.63 (2.58-12.26) | 6.40 (3.15-12.97) | 5.18 (2.14-12.52) |
| Pupillary light reflex | Both non-reactive | 2.83 (1.94-4.14) | <0.0001 | 3.26 (2.13-4.99) | <0.0001 | 2.40 (1.59-3.63) | <0.0001 | 1.92 (1.18-3.14) | 0.0086 |
| Injury cause (vs Fall) | Road traffic accident | 1.25 (0.89-1.76) | 0.0147 | 1.15 (0.87-1.52) | 0.076 | 1.31 (1.01-1.70) | 0.0206 | NA | NA |
| Other non-intentional | 1.90 (0.83-4.37) | 0.61 (0.32-1.14) | 1.00 (0.55-1.80) | NA |
| Unknown | 0.49 (0.26-0.92) | 0.68 (0.40-1.15) | 0.62 (0.38-1.01) | NA |
| Pupil size | Bilateral mydriasis | 1.88 (1.13-3.14) | 0.0146 | NA | NA | 3.26 (1.32-8.07) | 0.0061 | 3.51 (1.25-9.85) | 0.0111 |
| Manual motor test | Quadriparesis | NA | NA | 2.23 (1.50-3.34) | <0.0001 | 2.00 (1.39-2.89) | 0.0002 | 2.49 (1.58-3.91) | <0.0001 |
| Image | EDH | Present | 0.34 (0.23-0.51) | <0.0001 | 0.46 (0.34-0.62) | <0.0001 | 0.46 (0.35-0.61) | <0.0001 | 0.42 (0.30-0.61) | <0.0001 |
| SAH | Present | 1.86 (1.23-2.82) | 0.0028 | 1.70 (1.25-2.33) | 0.0007 | 1.32 (0.99-1.76) | 0.0618 | 1.50 (1.05-2.14) | 0.0255 |
| Diffuse axonal injury | Present | 0.14 (0.03-0.66) | 0.0019 | NA | NA | NA | NA | NA | NA |
| IVH | Present | NA | NA | 1.47 (1.03-2.11) | 0.0342 | 1.60 (1.16-2.20) | 0.0044 | 1.43 (0.93-2.21) | 0.1040 |
| Cisternal compresion | Present | NA | NA | 1.73 (1.26-2.38) | 0.0008 | 1.46 (1.09-1.95) | 0.0107 | 2.73 (1.84-4.05) | <0.0001 |
| Contusion | Present | NA | NA | 1.65 (1.21-2.25) | 0.0015 | 1.84 (1.38-2.45) | <0.0001 | NA | NA |
| Midline shift | Present | NA | NA | 1.50 (1.07-2.12) | 0.0193 | 1.22 (0.90-1.66) | 0.202 | 1.63 (1.09-2.43) | 0.0164 |
| Lab | aPTT | Spline | Nonlinear (df=4) | <0.0001 | Nonlinear (df=4) | <0.0001 | Nonlinear (df=4) | <0.0001 | Nonlinear (df=4) | <0.0001 |
| CRP | Spline | Nonlinear (df=4) | <0.0001 | Nonlinear (df=4) | 0.0009 | Nonlinear (df=4) | 0.0002 | Nonlinear (df=4) | <0.0001 |
| Sodium | Spline | Nonlinear (df=4) | 0.0060 | Nonlinear (df=4) | 0.0033 | Nonlinear (df=4) | 0.0524 | NA | NA |
| Platelet | Spline | Nonlinear (df=4) | 0.0028 | NA | NA | NA | NA | NA | NA |
| AST | Spline | Nonlinear (df=4) | 0.0029 | NA | NA | NA | NA | NA | NA |
| ALP | Spline | NA | NA | Nonlinear (df=4) | 0.0004 | Nonlinear (df=4) | 0.0029 | Nonlinear (df=4) | <0.0001 |
| Albumin | Spline | NA | NA | NA | NA | Nonlinear (df=4) | 0.0100 | Nonlinear (df=4) | 0.1220 |
| BUN | Spline | NA | NA | NA | NA | Nonlinear (df=4) | 0.0177 | NA | NA |
| Reference categories are indicated in the ‘Prognostic Variable’ column as (vs …).  If not indicated as ‘(vs …)’, the reference category is “Absent”.  For variables not included in each endpoint, odds ratio or LR p-value is noted as ‘NA’. ‘Spline’ denotes variables analyzed as nonlinear terms in models.  Lab variables modeled with splines do not yield a single odds ratio; therefore, reported as ‘Nonlinear (df = 4)’ in the OR column.  See Fig. 1 for graphs of relative odds ratios for these variables. 'df' refers to degree of freedom. Variables marked as ‘NA’ in the OR and LR p-value columns were not included in the respective models.  ‘LR p-value’ refers to the likelihood ratio test p-value. AIS = Abbreviated Injury Scale; LOC = Level of Consciousness; EDH = Epidural Hemorrhage; SAH = Subarachnoid Hemorrhage; IVH = Intraventricular Hemorrhage; ALP = Alkaline Phosphatase | | | | | | | | | | |

Table 3. Performance of AJOU-Adapted models for 14-day mortality on internal AJOU (train/test split) and external CENTER datasets

|  | Model | AJOU-Adapted-Clinical | AJOU-Adapted-CT | AJOU-Adapted-Full |
| --- | --- | --- | --- | --- |
| Model Info. | No. of variables | 6 | 9 | 14 |
| Regularization | Elastic Net (α=0.6, λ=0.04) | Elastic Net (α=0.5, λ=0.05) | Lasso (λ=0.009) |
| Train (AJOU) | events / patients (%) | 299 / 2312 (12.9%) | | |
| AUROC | 0.885 (0.865 - 0.905) | 0.896 (0.877 – 0.914) | 0.921 (0.904 – 0.938) |
| Brier score | 0.079 (0.071-0.087) | 0.078 (0.071 -0.086) | 0.063 (0.056 – 0.070) |
| Calibration slope | 1.359 (1.231 – 1.486) | 1.437 (1.303 – 1.571) | 1.241 (1.122 – 1.360) |
| Calibration intercept | 0 (-0.135 – 0.135) | 0 (-0.135 – 0.135) | 0 (-0.151 – 0.151) |
| Test  (AJOU) | events / patients (%) | 74 / 577 (12.8%) | | |
| AUROC | 0.875 (0.833 – 0.917) | 0.875 (0.832 – 0.917) | 0.902 (0.865 – 0.939) |
| Brier score | 0.080 (0.064-0.095) | 0.079 (0.064 – 0.095) | 0.069 (0.055 – 0.084) |
| Calibration slope | 1.383 (1.118 – 1.648) | 1.429 (1.156 – 1.702) | 1.027 (0.829 – 1.224) |
| Calibration intercept | -0.004 (-0.274 – 0.265) | -0.016 ( -0.285 – 0.252) | -0.128 (-0.439 – 0.183) |
| CENTER | events / patients (%) | 122 / 1040 (11.7%) | | |
| AUROC | 0.859 (0.827 – 0.887) | 0.856 (0.824 – 0.884) | 0.857 (0.826 – 0.886) |
| Brier score | 0.080 (0.073 – 0.113) | 0.080 (0.073 – 0.113) | 0.081 (0.073 – 0.115) |
| Calibration slope | 1.145 (0.987 – 1.324) | 1.151 (0.993 – 1.336) | 0.978 (0.849 – 1.129) |
| Calibration intercept | 0.320 (0.106 – 0.512) | 0.274 (0.058 – 0.469) | 0.610 (0.380 – 0.818) |
| The AJOU dataset was randomly split into training and test sets in a 1:4 ratio, while preserving a similar event-to-patient distribution between the two subsets. After internal validation, the final models were refitted on the entire AJOU dataset and then externally validated on the CENTER dataset. All performances were estimated using 1,000 bootstrap resamples.  Info. = Information; AUROC = Area Under the Receiver Operating Characteristic curve | | | | |

Table 4. Performance of AJOU-Adapted models for 3-month unfavorable outcome on internal AJOU (train/test split) and external CENTER datasets

|  | Model | AJOU-Adapted-Clinical | AJOU-Adapted-CT | AJOU-Adapted-Full |
| --- | --- | --- | --- | --- |
| Model Info. | No. of variables | 5 | 11 | 15 |
| Regularization | Elastic Net (α=0.5, λ=0.0002) | Elastic Net (α=0.2, λ=0.001) | Elastic Net (α=0.3, λ=0.0025) |
| Train (AJOU) | events / patients (%) | 771 / 1849 (41.7%) | | |
| AUROC | 0.886 (0.871 – 0.901) | 0.902 (0.888 – 0.916) | 0.914 (0.900 – 0.927) |
| Brier score | 0.133 (0.124 – 0.143) | 0.122 (0.113 – 0.132) | 0.113 (0.104 – 0.122) |
| Calibration slope | 1.005 (0.917 – 1.094) | 1.016 (0.928 – 1.104) | 1.050 (0.958 – 1.142) |
| Calibration intercept | 0 (-0.125 – 0.125) | 0 (-0.130 – 0.130) | 0 (-0.133 – 0.133) |
| Test  (AJOU) | events / patients (%) | 192 / 461 (41.6%) | | |
| AUROC | 0.903 (0.876 – 0.930) | 0.911 (0.885 – 0.937) | 0.921 (0.897 – 0.945) |
| Brier score | 0.124 (0.107 – 0.141) | 0.119 (0.101 – 0.137) | 0.112 (0.095- 0.128) |
| Calibration slope | 1.176 (0.965 – 1.386) | 1.094 (0.902 – 1.286) | 1.160 (0.952 – 1.368) |
| Calibration intercept | 0.002 (-0.244 – 0.249) | -0.041 (-0.299 – 0.217) | -0.004 (-0.264 – 0.257) |
| CENTER | events / patients (%) | 400 / 974 (41.1%) | | |
| AUROC | 0.831 (0.806 – 0.856) | 0.846 (0.822 – 0.871) | 0.850 (0.827 – 0.873) |
| Brier score | 0.173 (0.159 – 0.187) | 0.159 (0.145 – 0.172) | 0.164 (0.150 – 0.178) |
| Calibration slope | 1.079 (0.949 – 1.239) | 1.043 (0.919 – 1.194) | 1.053 (0.930 – 1.201) |
| Calibration intercept | 0.365 (0.212 – 0.509) | 0.309 (0.140 – 0.457) | 0.528 (0.354 – 0.677) |
| The AJOU dataset was randomly split into training and test sets in a 1:4 ratio, while preserving a similar event-to-patient distribution between the two subsets. After internal validation, the final models were refitted on the entire AJOU dataset and then externally validated on the CENTER dataset. All performances were estimated using 1,000 bootstrap resamples.  Info. = Information; AUROC = Area Under the Receiver Operating Characteristic curve | | | | |

Table 5. Performance of AJOU-Adapted models for 6-month unfavorable outcome on internal AJOU (train/test split) and external CENTER datasets

|  | Model | AJOU-Adapted-Clinical | AJOU-Adapted-CT | AJOU-Adapted-Full |
| --- | --- | --- | --- | --- |
| Model Info. | No. of variables | 6 | 12 | 18 |
| Regularization | Elastic Net (α=0.2, λ=0.018) | Elastic Net (α=0.1, λ=0.045) | Elastic Net (α=0.4, λ=0.032) |
| Train (AJOU) | events / patients (%) | 830 / 2178 (38.1%) | | |
| AUROC | 0.877 (0.862- 0.892) | 0.890 (0.876 – 0.904) | 0.902 (0.889 – 0.915) |
| Brier score | 0.134 (0.126 – 0.142) | 0.128 (0.121 – 0.136) | 0.121 (0.114 – 0.129) |
| Calibration slope | 1.231 (1.128 – 1.334) | 1.364 (1.252 – 1.476) | 1.419 (1.302 – 1.536) |
| Calibration intercept | 0 (-0.108 – 0.108) | 0 (-0.107 – 0.107) | 0 (-0.108 – 0.108) |
| Test  (AJOU) | events / patients (%) | 207 / 544 (38.1%) | | |
| AUROC | 0.897 (0.871 – 0.924) | 0.901 (0.874 – 0.928) | 0.903 (0.876 – 0.931) |
| Brier score | 0.127 (0.111 – 0.142) | 0.125 (0.110 – 0.140) | 0.120 (0.104 – 0.135) |
| Calibration slope | 1.335 (1.114 – 1.556) | 1.448 (1.206 – 1.689) | 1.360 (1.137 – 1.584) |
| Calibration intercept | -0.019 (-0.236 – 0.198) | -0.024 (-0.237 – 0.189) | -0.009 (-0.229 – 0.210) |
| CENTER | events / patients (%) | 334 / 984 (33.9%) | | |
| AUROC | 0.852 (0.828 – 0.877) | 0.866 (0.841 - 0.888) | 0.866 (0.841 – 0.888) |
| Brier score | 0.149 (0.137 – 0.162) | 0.140 (0.128 – 0.153) | 0.141 (0.129 - 0.154) |
| Calibration slope | 1.166 (1.031 – 1.329) | 1.209 (1.067 – 1.378) | 1.282 (1.130 – 1.458) |
| Calibration intercept | 0.108 (-0.043 – 0.252) | 0.020 (-0.129 – 0.162) | -0.004 (-0.145 – 0.148) |
| The AJOU dataset was randomly split into training and test sets in a 1:4 ratio, while preserving a similar event-to-patient distribution between the two subsets. After internal validation, the final models were refitted on the entire AJOU dataset and then externally validated on the CENTER dataset. All performances were estimated using 1,000 bootstrap resamples.  Info. = Information; AUROC = Area Under the Receiver Operating Characteristic curve | | | | |

Table 6. Performance of AJOU-Adapted models for 12-month unfavorable outcome on internal AJOU (train/test split) and external CENTER datasets

|  | Model | AJOU-Adapted-Clinical | AJOU-Adapted-CT | AJOU-Adapted-Full |
| --- | --- | --- | --- | --- |
| Model Info. | No. of variables | 5 | 10 | 14 |
| Regularization | Elastic Net (α=0.1, λ=0.042) | Elastic Net (α=0.4, λ=0.035) | Elastic Net (α=0.1, λ=0.054) |
| Train (AJOU) | events / patients (%) | 576 / 1462 (39.4%) | | |
| AUROC | 0.888 (0.871 – 0.906) | 0.902 (0.885 – 0.918) | 0.923 (0.908 – 0.937) |
| Brier score | 0.130 (0.120 – 0.139) | 0.120 (0.110 – 0.129) | 0.105 (0.096 – 0.114) |
| Calibration slope | 1.393 (1.255 – 1.531) | 1.381 (1.246 -1.515) | 1.430 (1.289 – 1.571) |
| Calibration intercept | 0 (-0.129 – 0.129) | 0 (-0.133 – 0.133) | 0 (-0.138 – 0.138) |
| Test  (AJOU) | events / patients (%) | 144 / 365 (39.5%) | | |
| AUROC | 0.912 (0.881 – 0.943) | 0.924 (0.896 – 0.952) | 0.927 (0.896 – 0.956) |
| Brier score | 0.115 (0.097 – 0.134) | 0.106 (0.088 – 0.124) | 0.098 (0.079 – 0.117) |
| Calibration slope | 1.453 (1.168 – 1.738) | 1.493 (1.205 -1.780) | 1.369 (1.103 – 1.635) |
| Calibration intercept | -0.028 (-0.294 – 0.239) | 0.028 (-0.245 – 0.301) | 0.086 (-0.202 – 0.374) |
| CENTER | events / patients (%) | 312 / 985 (31.7%) | | |
| AUROC | 0.834 (0.806 – 0.861) | 0.854 (0.827 – 0.880) | 0.854 (0.828 – 0.878) |
| Brier score | 0.152 (0.138 – 0.166) | 0.141 (0.127 – 0.156) | 0.141 (0.128 – 0.153) |
| Calibration slope | 0.995 (0.865 – 1.148) | 0.975 (0.862 – 1.104) | 1.097 (0.966 – 1.260) |
| Calibration intercept | 0.019 (-0.140 – 0.181) | -0.176 (-0.339 – 0.006) | -0.251 (-0.410 – 0.100) |
| The AJOU dataset was randomly split into training and test sets in a 1:4 ratio, while preserving a similar event-to-patient distribution between the two subsets. After internal validation, the final models were refitted on the entire AJOU dataset and then externally validated on the CENTER dataset. All performances were estimated using 1,000 bootstrap resamples.  Info. = Information; AUROC = Area Under the Receiver Operating Characteristic curve | | | | |

Table 7. Performance Comparison of AJOU-Adapted and IMPACT Models in the External CENTER Dataset

| Outcome | Models | n. of variables | AUROC | Brier score | Calibration slope | Calibration intercept |
| --- | --- | --- | --- | --- | --- | --- |
| 14 day mortality | AJOU-Adapted-Clinical | 6 | 0.859 | 0.080 | 1.145 | 0.320 |
| AJOU-Adapted-CT | 9 | 0.854 | 0.080 | 1.151 | 0.274 |
| AJOU-Adapted-Full | 14 | 0.853 | 0.082 | 0.978 | 0.610 |
| IMPACT-core | 3 | 0.854 | 0.105 | 1.348 | -1.247 |
| IMPACT-extended | 8 | 0.880 | 0.104 | 1.273 | -1.354 |
| IMPACT-lab | 10 | 0.888 | 0.090 | 1.380 | -1.075 |
| 6 month unfavorable outcome | AJOU-Adapted-Clinical | 6 | 0.852 | 0.149 | 1.166 | 0.108 |
| AJOU-Adapted-CT | 12 | 0.866 | 0.140 | 1.209 | 0.020 |
| AJOU-Adapted-Full | 18 | 0.866 | 0.141 | 1.282 | -0.004 |
| IMPACT-core | 3 | 0.816 | 0.176 | 1.216 | -0.632 |
| IMPACT-extended | 8 | 0.850 | 0.155 | 1.156 | -0.551 |
| IMPACT-lab | 10 | 0.855 | 0.147 | 1.173 | -0.304 |
| Performance of the AJOU-Adapted and IMPACT models was compared using the external CENTER-TBI dataset. The analysis included 1,040 patients for 14-day mortality and 984 patients for 6-month unfavorable outcome. All performance metrics (AUROC, Brier score, calibration slope, and calibration intercept) were estimated with 1,000 bootstrap resamples. AUROC, area under the receiver operating characteristic curve. | | | | | | |

Table 8. Pairwise comparison of AUROC between AJOU-Adapted and IMPACT models in the external CENTER-TBI dataset (DeLong's test)

| **Comparison** | **AUROC AJOU** | **AUROC IMPACT** | **ΔAUROC** | **95% CI** | **z** | **p-value** | **Favors** |
| --- | --- | --- | --- | --- | --- | --- | --- |
| ***14-day mortality (n = 1,040; events = 122, non-events = 918)*** | | | | | | | |
| AJOU-Adapted-Clinical vs IMPACT-core | 0.859 | 0.854 | +0.004 | (-0.018, +0.027) | 0.40 | 0.688 | ns |
| AJOU-Adapted-Clinical vs IMPACT-extended | 0.859 | 0.880 | -0.021 | (-0.044, +0.001) | -1.88 | 0.061 | ns |
| **AJOU-Adapted-Clinical vs IMPACT-lab** | **0.859** | **0.888** | **-0.029** | **(-0.054, -0.005)** | **-2.34** | **0.019** | **IMPACT** |
| AJOU-Adapted-CT vs  IMPACT-core | 0.854 | 0.854 | +0.000 | (-0.025, +0.025) | 0.02 | 0.987 | ns |
| **AJOU-Adapted-CT vs IMPACT-extended** | **0.854** | **0.880** | **-0.026** | **(-0.048, -0.003)** | **-2.21** | **0.027** | **IMPACT** |
| **AJOU-Adapted-CT vs IMPACT-lab** | **0.854** | **0.888** | **-0.034** | **(-0.059, -0.009)** | **-2.67** | **0.008** | **IMPACT** |
| AJOU-Adapted-Full vs  IMPACT-core | 0.853 | 0.854 | -0.001 | (-0.030, +0.028) | -0.09 | 0.929 | ns |
| **AJOU-Adapted-Full vs IMPACT-extended** | **0.853** | **0.880** | **-0.027** | **(-0.053, -0.001)** | **-2.03** | **0.042** | **IMPACT** |
| **AJOU-Adapted-Full vs IMPACT-lab** | **0.853** | **0.888** | **-0.035** | **(-0.062, -0.009)** | **-2.64** | **0.008** | **IMPACT** |
| ***6-month unfavorable outcome (n = 984; events = 334, non-events = 650)*** | | | | | | | |
| **AJOU-Adapted-Clinical vs IMPACT-core** | **0.852** | **0.816** | **+0.037** | **(+0.018, +0.056)** | **3.75** | **0.0002** | **AJOU** |
| AJOU-Adapted-Clinical vs IMPACT-extended | 0.852 | 0.850 | +0.003 | (-0.015, +0.020) | 0.28 | 0.782 | ns |
| AJOU-Adapted-Clinical vs IMPACT-lab | 0.852 | 0.855 | -0.002 | (-0.020, +0.016) | -0.23 | 0.820 | ns |
| **AJOU-Adapted-CT vs IMPACT-core** | **0.866** | **0.816** | **+0.050** | **(+0.028, +0.072)** | **4.53** | **<0.0001** | **AJOU** |
| **AJOU-Adapted-CT vs IMPACT-extended** | **0.866** | **0.850** | **+0.016** | **(+0.000, +0.032)** | **1.99** | **0.047** | **AJOU** |
| AJOU-Adapted-CT vs  IMPACT-lab | 0.866 | 0.855 | +0.011 | (-0.005, +0.027) | 1.38 | 0.167 | ns |
| **AJOU-Adapted-Full vs IMPACT-core** | **0.866** | **0.816** | **+0.050** | **(+0.028, +0.072)** | **4.48** | **<0.0001** | **AJOU** |
| AJOU-Adapted-Full vs  IMPACT-extended | 0.866 | 0.850 | +0.016 | (-0.001, +0.032) | 1.84 | 0.065 | ns |
| AJOU-Adapted-Full vs  IMPACT-lab | 0.866 | 0.855 | +0.011 | (-0.006, +0.028) | 1.30 | 0.194 | ns |
| Pairwise AUROC comparisons were performed using DeLong's test for two correlated ROC curves. Highlighted rows indicate statistically significant comparisons (p < 0.05); the 'Favors' column indicates the model with higher discrimination when the difference is significant, or 'ns' (not significant) otherwise. Abbreviations: AUROC, area under the receiver operating characteristic curve; CI, confidence interval; ns, not statistically significant. | | | | | | | |
