# Supplementary material
Source: Research Square preprint supplement (doi:10.21203/rs.3.rs-9647356/v1)
Supplement: Supplementary file 4 [file 4bb70f6f9bcc0caeceb8121f.xlsx]

## Sheet: Table S10
Table S10. Univariable analysis of clinical variables for 14-day death and 3-/6-/12-month unfavorable outcome
Prognostic Variable	Category	Inhospital Death		Unfavorable Outcome at 3 Month		Unfavorable Outcome at 6 Month		Unfavorable Outcome at 12 Month
		OR (95% CI)	p-value	OR (95% CI)	p-value	OR (95% CI)	p-value	OR (95% CI)	p-value
Age		1.016 (1.011-1.022)	<0.0001	1.023 (1.018-1.028)	<0.0001	1.025 (1.020-1.030)	<0.0001	1.022 (1.016-1.028)	<0.0001
Sex (vs Female)	Male	0.82 (0.66-1.00)	0.1114	1.00 (0.82-1.23)	0.965	1.02 (0.85-1.23)	0.847	1.01 (0.81-1.26)	0.959
Hours since injury		0.86 (0.81-0.91)	<0.0001	0.88 (0.84-0.92)	<0.0001	0.91 (0.87-0.94)	<0.0001	0.87 (0.82-0.91)	<0.0001
Injury cause (vs Traffic accident)	Incidental fall	0.81 (0.66-1.00)	0.0495	0.94 (0.79-1.12)	0.507	0.93 (0.79-1.09)	0.364	0.89 (0.73-1.08)	0.239
	Violence	0.17 (0.03-0.55)	0.0144	0.14 (0.05-0.34)	<0.0001	0.19 (0.07-0.41)	0.0001	0.21 (0.07-0.49)	0.0012
	Suicide attempt	1.53 (0.22-6.70)	0.603	3.73 (0.48-75.57)	0.255	0.74 (0.10-3.81)	0.729	4.11 (0.52-83.19)	0.222
	Other non-intentional	0.42 (0.18-0.82)	0.0205	0.27 (0.14-0.47)	<0.0001	0.34 (0.19-0.56)	<0.0001	0.23 (0.11-0.43)	<0.0001
Injury Mechanism (vs High velocity trauma)	Blow to head	0.37 (0.16-0.73)	0.0085	0.24 (0.13-0.42)	<0.0001	0.30 (0.17-0.51)	<0.0001	0.27 (0.14-0.49)	<0.0001
	Head against object	0.21 (0.01-1.01)	0.127	0.12 (0.02-0.43)	0.0051	0.22 (0.05-0.65)	0.0156	0.08 (0.00-0.37)	0.0124
	Ground level fall	0.76 (0.60-0.96)	0.0215	0.83 (0.68-1.02)	0.0738	0.85 (0.70-1.02)	0.083	0.76 (0.61-0.96)	0.0222
	Fall from height	0.92 (0.70-1.20)	0.544	1.13 (0.89-1.42)	0.32	1.05 (0.85-1.29)	0.667	1.08 (0.83-1.39)	0.572
Road accident (vs occupant)	Pedestrian	1.81 (1.23-2.70)	0.003	2.00 (1.43-2.80)	<0.0001	1.91 (1.40-2.63)	<0.0001	1.80 (1.26-2.58)	0.0014
	Cyclist	0.87 (0.48-1.51)	0.627	1.00 (0.63-1.58)	0.985	1.02 (0.66-1.55)	0.942	1.02 (0.62-1.66)	0.949
	Moped/Scooter	0.71 (0.26-1.65)	0.463	0.82 (0.37-1.72)	0.612	0.70 (0.34-1.35)	0.301	2.52 (1.02-6.41)	0.0458
	Motor Bike	1.14 (0.73-1.78)	0.561	1.72 (1.19-2.47)	0.0036	1.37 (0.97-1.93)	0.071	1.45 (0.98-2.15)	0.064
Level of Consciousness (vs Alert)	Drowsy	2.52 (1.45-4.57)	0.0015	3.47 (2.45-4.98)	<0.0001	2.85 (2.11-3.90)	<0.0001	3.07 (2.04-4.75)	<0.0001
	Stupor	8.07 (4.83-14.25)	<0.0001	10.13 (7.09-14.72)	<0.0001	7.88 (5.77-10.89)	<0.0001	9.31 (6.13-14.47)	<0.0001
	Semicoma	24.11 (14.92-41.61)	<0.0001	27.55 (19.35-39.96)	<0.0001	19.31 (14.20-26.61)	<0.0001	27.18 (18.16-41.81)	<0.0001
	Coma	76.07 (45.59-134.78)	<0.0001	136.17 (77.77-253.62)	<0.0001	86.83 (54.08-145.05)	<0.0001	134.94 (75.28-256.24)	<0.0001
GCS eye score (vs 4)	3	1.60 (1.04-2.48)	0.0342	2.26 (1.71-3.01)	<0.0001	1.71 (1.33-2.20)	<0.0001	2.19 (1.57-3.06)	<0.0001
	2	6.26 (4.06-9.74)	<0.0001	5.97 (4.23-8.44)	<0.0001	4.33 (3.18-5.91)	<0.0001	6.20 (4.21-9.17)	<0.0001
	1	14.37 (10.25-20.68)	<0.0001	19.39 (14.75-25.71)	<0.0001	13.49 (10.64-17.20)	<0.0001	18.34 (13.53-25.15)	<0.0001
GCS verbal score (vs 5)	4	2.3 (1.43-3.67)	0.0005	3.26 (2.39-4.44)	<0.0001	3.13 (2.37-4.14)	<0.0001	3.30 (2.31-4.72)	<0.0001
	3	4.59 (2.29-8.63)	<0.0001	7.05 (4.08-12.28)	<0.0001	5.21 (3.22-8.38)	<0.0001	4.66 (2.40-8.82)	<0.0001
	2	7.05 (4.65-10.74)	<0.0001	8.29 (5.91-11.69)	<0.0001	6.88 (5.10-9.32)	<0.0001	8.15 (5.60-11.92)	<0.0001
	1	18.58 (13.39-26.31)	<0.0001	23.05 (17.39-30.82)	<0.0001	19.66 (15.26-25.47)	<0.0001	24.61 (18.06-33.90)	<0.0001
	T	12.71 (8.41-19.36)	<0.0001	17.71 (12.03-26.53)	<0.0001	12.40 (8.83-17.57)	<0.0001	13.83 (9.13-21.23)	<0.0001
GCS motor score (vs 6)	5	1.60 (0.95-2.62)	0.069	1.73 (1.26-2.37)	0.0007	1.52 (1.13-2.03)	0.0052	1.39 (0.95-2.02)	0.087
	4	5.39 (3.79-7.74)	<0.0001	5.78 (4.45-7.53)	<0.0001	4.79 (3.80-6.07)	<0.0001	5.48 (4.08-7.40)	<0.0001
	3	11.12 (7.50-16.60)	<0.0001	12.49 (8.70-18.18)	<0.0001	9.36 (6.81-12.96)	<0.0001	12.03 (8.15-17.99)	<0.0001
	2	13.44 (8.05-22.33)	<0.0001	21.03 (11.79-40.04)	<0.0001	18.01 (10.68-31.88)	<0.0001	16.32 (9.09-30.73)	<0.0001
	1	30.11 (21.22-43.38)	<0.0001	33.50 (22.83-50.49)	<0.0001	27.83 (19.75-40.03)	<0.0001	36.81 (24.47-56.92)	<0.0001
MMT of upper extremities (vs preserved)	Unilateral abnormality	1.3 (0.39-3.26)	0.617	3.29 (1.64-6.64)	0.0008	3.53 (1.90-6.56)	<0.0001	1.59 (0.50-4.34)	0.387
	Bilateral abnormalities	15.19 (11.88-19.51)	<0.0001	21.38 (15.99-29.05)	<0.0001	19.21 (14.83-25.16)	<0.0001	24.38 (17.91-33.75)	<0.0001
MMT of lower extremities (vs preserved)	Unilateral abnormality	1.72 (0.51-4.37)	0.311	2.44 (1.08-5.32)	0.0268	4.09 (2.10-8.02)	<0.0001	3.30 (1.25-8.46)	0.0129
	Bilateral abnormalities	15.54 (12.10-20.09)	<0.0001	21.88 (16.44-29.54)	<0.0001	18.38 (14.29-23.88)	<0.0001	24.13 (17.86-33.09)	<0.0001
MMT of upper & lower extremities (vs both preserved)	Both Bilateral abn.	17.31 (13.40-22.50)	<0.0001	24.13 (17.89-33.09)	<0.0001	21.25 (16.26-28.11)	<0.0001	28.41 (20.62-39.86)	<0.0001
	Both Unilateral abn.	2.07 (0.49-6.05)	0.24	3.40 (1.24-9.32)	0.0151	4.91 (2.14-11.60)	0.0002	2.51 (0.51-10.32)	0.21
	Lower Bilateral abn.	2.68 (0.90-6.45)	0.0455	6.81 (2.81-18.10)	<0.0001	4.94 (2.39-10.47)	<0.0001	4.61 (1.92-11.19)	0.0006
	Lower Unilateral abn.	1.11 (0.06-6.49)	0.923	1.46 (0.31-5.28)	0.586	3.24 (1.04-9.81)	0.0356	4.19 (1.16-15.18)	0.0245
	Upper Bilateral abn.	1.28 (0.07-6.49)	0.815	5.67 (1.38-27.78)	0.0179	9.45 (3.14-34.61)	0.0002	2.79 (0.37-16.95)	0.262
	Upper Unilateral abn.	0.98 (0.05-4.82)	0.981	2.13 (0.64-6.42)	0.188	1.37 (0.38-4.05)	0.589	1.20 (0.18-4.99)	0.824
Pupil size (vs isochoric)	Anisochoric	3.80 (2.95-4.88)	<0.0001	4.84 (3.76-6.26)	<0.0001	4.12 (3.30-5.17)	<0.0001	4.54 (3.47-5.97)	<0.0001
	Bilaterally myotic	1.52 (0.24-5.63)	0.583	3.19 (0.91-12.54)	0.073	2.93 (0.88-10.19)	0.077	2.51 (0.59-10.64)	0.196
	Bilaterally mydriatic	19.67 (13.59-28.87)	<0.0001	26.82 (14.70-54.97)	<0.0001	32.69 (17.98-66.83)	<0.0001	32.85 (17.46-70.30)	<0.0001
Pupillary light reflex (vs normal)	Unilateral absence	3.96 (2.53-6.03)	<0.0001	3.85 (2.57-5.85)	<0.0001	3.53 (2.46-5.10)	<0.0001	3.99 (2.56-6.25)	<0.0001
	Bilateral absence	18.79 (14.67-24.16)	<0.0001	20.09 (14.54-28.42)	<0.0001	18.80 (14.04-25.62)	<0.0001	20.08 (14.51-28.37)	<0.0001
ISS score		1.087 (1.076-1.099)	<0.0001	spline (df=4)	<0.0001	spline (df=4)	<0.0001	spline (df=4)	<0.0001
Head/neck AIS (vs 2)	3	2.49 (0.72-15.73)	0.221	1.41 (0.82-2.56)	0.234	1.61 (0.96-2.85)	0.083	3.36 (1.45-9.76)	0.0023
	4	16.55 (5.17-101.00)	<0.0001	6.98 (4.17-12.48)	<0.0001	6.78 (4.13-11.82)	<0.0001	13.98 (6.18-40.14)	<0.0001
	5	54.51 (17.98-342.40)	<0.0001	24.06 (14.50-42.70)	<0.0001	21.25 (13.09-36.79)	<0.0001	56.88 (25.40-162.41)	<0.0001
Arrival SBP		spline (df=4)	<0.0001	spline (df=4)	<0.0001	spline (df=4)	<0.0001	spline (df=4)	<0.0001
Arrival DBP		spline (df=4)	<0.0001	spline (df=4)	<0.0001	spline (df=4)	<0.0001	spline (df=4)	<0.0001
Arrival HR		spline (df=4)	<0.0001	spline (df=4)	<0.0001	spline (df=4)	<0.0001	spline (df=4)	<0.0001
Arrival RR		spline (df=4)	<0.0001	spline (df=4)	<0.0001	spline (df=4)	<0.0001	spline (df=4)	<0.0001
Ethanol intoxication (vs normal)	Intoxicated	0.68 (0.52-0.88)	0.0037	0.59 (0.47-0.76)	<0.0001	0.56 (0.45-0.70)	<0.0001	0.55 (0.42-0.72)	<0.0001
Variables modeled nonlinearly with restricted cubic splines are indicated as “spline (df = 4)” in the OR (95% CI) column. GCS: Glasgow coma scale, MMT: Manual motor test, abn.: Abnormality, ISS: Injury severity score, AIS: Abbreviated injury scale, SBP: Systolic blood pressure, DBP: Diastolic blood pressure, HR: Heart rate, RR: Respiratory rate, df: Degree of freedom

## Sheet: Table S11
Table S11. Univariable analysis of CT variables for 14-day death and 3-/6-/12-month unfavorable outcome
Prognostic Variable	Category	Inhospital Death		Unfavorable Outcome at 3 Month		Unfavorable Outcome at 6 Month		Unfavorable Outcome at 12 Month
		OR (95% CI)	p-value	OR (95% CI)	p-value	OR (95% CI)	p-value	OR (95% CI)	p-value
EDH (vs absence)	Presence	0.41 (0.31-0.52)	<0.0001	0.59 (0.48-0.72)	<0.0001	0.57 (0.48-0.69)	<0.0001	0.56 (0.45-0.70)	<0.0001
SDH (vs absence)	Presence	6.23 (4.36-9.22)	<0.0001	4.22 (3.37-5.32)	<0.0001	4.14 (3.34-5.16)	<0.0001	5.03 (3.88-6.59)	<0.0001
Contusion (vs absence)	Presence	1.44 (1.17-1.79)	0.0006	2.46 (2.03-2.98)	<0.0001	2.27 (1.90-2.71)	<0.0001	1.95 (1.59-2.41)	<0.0001
DAI (vs absence)	Presence	0.21 (0.05-0.56)	0.0081	2.20 (1.30-3.78)	0.0036	1.47 (0.92-2.36)	0.105	0.83 (0.43-1.54)	0.556
SAH (vs absence)	Presence	3.01 (2.35-3.90)	<0.0001	3.68 (3.00-4.52)	<0.0001	2.84 (2.36-3.42)	<0.0001	3.41 (2.73-4.29)	<0.0001
IVH (vs absence)	Presence	2.72 (2.15-3.41)	<0.0001	4.55 (3.50-5.97)	<0.0001	4.50 (3.56-5.70)	<0.0001	4.16 (3.14-5.57)	<0.0001
Midline shift (vs absence)	Presence	3.77 (3.08-4.62)	<0.0001	6.92 (5.45-8.86)	<0.0001	5.03 (4.12-6.16)	<0.0001	6.71 (5.21-8.70)	<0.0001
Basal cistern compression (vs absence)	Presence	2.79 (2.27-3.43)	<0.0001	5.20 (4.14-6.57)	<0.0001	4.08 (3.36-4.98)	<0.0001	6.20 (4.79-8.09)	<0.0001
Marshall score (vs I)	II	2.02 (0.43-36.00)	0.491	2.56 (1.03-8.54)	0.074	1.64 (0.76-4.30)	0.255	1.15 (0.52-3.04)	0.76
	III	21.08 (4.58-374.29)	0.0026	29.44 (11.67-99.20)	<0.0001	14.63 (6.67-38.60)	<0.0001	18.32 (8.11-49.34)	<0.0001
	IV	25.01 (5.39-445.18)	0.0015	51.02 (19.43-176.35)	<0.0001	18.64 (8.35-49.80)	<0.0001	25.27 (10.74-70.14)	<0.0001
	V	31.12 (6.81-551.48)	0.0007	25.76 (10.34-86.13)	<0.0001	16.67 (7.65-43.80)	<0.0001	13.98 (6.33-37.08)	<0.0001
	VI	43.63 (9.21-781.19)	0.0002	39.38 (14.18-141.43)	<0.0001	24.83 (10.34-70.07)	<0.0001	23.71 (9.34-70.04)	<0.0001
Basilar skull fracture (vs absence)	Presence	1.23 (1.01-1.50)	0.0381	1.42 (1.19-1.69)	0.0001	1.35 (1.15-1.59)	0.0003	1.43 (1.18-1.74)	0.0003
Calvarial fracture (vs absence)	Presence	1.93 (1.56-2.41)	<0.0001	1.96 (1.63-2.36)	<0.0001	1.73 (1.46-2.06)	<0.0001	2.23 (1.80-2.75)	<0.0001
Facial fracture (vs absence)	Presence	0.79 (0.63-0.99)	0.0468	0.69 (0.57-0.84)	0.0002	0.75 (0.62-0.90)	0.0022	0.58 (0.47-0.72)	<0.0001
EDH: Epidural hemorrhage, SDH: Subdural hemorrhage, DAI: Diffuse axonal injury, SAH: Subarachnoid hemorrhage, IVH: Intraventricular hemorrhage

## Sheet: Table S12
Table S12. Univariable analysis of laboratory variables for 14-day death and 3-/6-/12-month unfavorable outcome
Prognostic Variable	Inhospital Death		Unfavorable Outcome at 3 Month		Unfavorable Outcome at 6 Month		Unfavorable Outcome at 12 Month
	OR (95% CI)	p-value	OR (95% CI)	p-value	OR (95% CI)	p-value	OR (95% CI)	p-value
AST	spline (df=4)	<0.0001	spline (df=4)	<0.0001	spline (df=4)	<0.0001	spline (df=4)	<0.0001
ALT	spline (df=4)	<0.0001	1.006 (1.004-1.008)	<0.0001	spline (df=4)	<0.0001	1.007 (1.005-1.009)	<0.0001
Alk. phosphatase	spline (df=4)	0.0029	1.004 (1.000-1.008)	0.065	spline (df=4)	0.0008	spline (df=4)	0.0103
Creatine kinase	spline (df=4)	<0.0001	spline (df=4)	<0.0001	spline (df=4)	<0.0001	spline (df=4)	0.0015
Total protein	spline (df=4)	<0.0001	spline (df=4)	<0.0001	spline (df=4)	<0.0001	spline (df=4)	<0.0001
Albumin	0.28 (0.23-0.35)	<0.0001	spline (df=4)	<0.0001	spline (df=4)	<0.0001	spline (df=4)	<0.0001
CRP	spline (df=4)	<0.0001	1.11 (1.09-1.13)	<0.0001	1.098 (1.082-1.116)	<0.0001	1.106 (1.085-1.127)	<0.0001
Total cholesterol	spline (df=4)	<0.0001	spline (df=4)	<0.0001	spline (df=4)	<0.0001	spline (df=4)	<0.0001
Glucose	spline (df=4)	<0.0001	spline (df=4)	<0.0001	spline (df=4)	<0.0001	spline (df=4)	<0.0001
LD	spline (df=4)	<0.0001	1.002 (1.001-1.005)	0.0115	1.002 (1.001-1.005)	0.0054	1.002 (1.001-1.004)	0.0065
Urea (BUN)	spline (df=4)	0.0065	1.030 (1.012-1.049)	0.0012	1.040 (1.023-1.057)	<0.0001	1.039 (1.019-1.059)	0.0001
Uric acid	0.97 (0.91-1.03)	0.358	1.005 (0.949-1.064)	0.864	0.99 (0.94-1.05)	0.81	0.99 (0.93-1.06)	0.8
Creatinine	2.48 (1.77-3.45)	<0.0001	1.87 (1.32-2.64)	0.0004	spline (df=4)	<0.0001	spline (df=4)	<0.0001
Sodium (Na)	spline (df=4)	<0.0001	spline (df=4)	<0.0001	spline (df=4)	<0.0001	spline (df=4)	0.0001
Potassium (K)	spline (df=4)	<0.0001	spline (df=4)	<0.0001	spline (df=4)	<0.0001	spline (df=4)	<0.0001
Chloride (Cl)	spline (df=4)	<0.0001	spline (df=4)	<0.0001	spline (df=4)	<0.0001	spline (df=4)	<0.0001
Magnesium (Mg)	spline (df=4)	<0.0001	spline (df=4)	0.0021	spline (df=4)	<0.0001	spline (df=4)	0.0018
Calcium (Ca)	0.42 (0.35-0.51)	<0.0001	spline (df=4)	<0.0001	spline (df=4)	<0.0001	spline (df=4)	<0.0001
Total Bilirubin	spline (df=4)	0.0078	spline (df=4)	<0.0001	spline (df=4)	<0.0001	spline (df=4)	<0.0001
Total CO₂	spline (df=4)	<0.0001	0.83 (0.81-0.86)	<0.0001	spline (df=4)	<0.0001	spline (df=4)	<0.0001
Amylase	1.005 (1.001-1.008)	0.0041	1.003 (1.000-1.007)	0.0335	1.003 (1.000-1.005)	0.078	1.004 (1.000-1.007)	0.0346
Lactic acid (POCT)	1.43 (1.33-1.54)	<0.0001	1.32 (1.22-1.42)	<0.0001	1.33 (1.24-1.43)	<0.0001	1.37 (1.26-1.49)	<0.0001
Lactic acid	spline (df=4)	<0.0001	1.41 (1.30-1.53)	<0.0001	1.27 (1.19-1.35)	<0.0001	1.35 (1.25-1.47)	<0.0001
Hemoglobin	0.77 (0.72-0.81)	<0.0001	0.74 (0.70-0.78)	<0.0001	0.75 (0.72-0.79)	<0.0001	0.74 (0.70-0.79)	<0.0001
WBC	1.036 (1.017-1.055)	0.0002	1.04 (1.02-1.06)	<0.0001	1.036 (1.020-1.052)	<0.0001	1.036 (1.017-1.056)	0.0002
Platelet	0.992 (0.990-0.994)	<0.0001	spline (df=4)	<0.0001	spline (df=4)	<0.0001	0.993 (0.991-0.995)	<0.0001
aPTT	spline (df=4)	<0.0001	spline (df=4)	<0.0001	1.137 (1.119-1.157)	<0.0001	spline (df=4)	<0.0001
PT	1.29 (1.25-1.35)	<0.0001	spline (df=4)	<0.0001	spline (df=4)	<0.0001	spline (df=4)	<0.0001
INR	spline (df=4)	<0.0001	spline (df=4)	<0.0001	spline (df=4)	<0.0001	spline (df=4)	<0.0001
Ethanol level	spline (df=4)	0.0021	0.997 (0.996-0.998)	<0.0001	spline (df=4)	<0.0001	0.997 (0.996-0.998)	<0.0001
Variables modeled nonlinearly with restricted cubic splines are indicated as “spline (df = 4)” in the OR (95% CI) column. df: Degree of Freedom, AST: Aspartate Aminotransferase, ALT: Alanine Aminotransferase, ALK: Alkaline, CRP: C-Reactive Protein, LD: Lactate Dehydrogenase, BUN: Blood Urea Nitrogen, POCT: Point-of-care Testing, WBC: White Blood Cell, aPTT: Activated Partial Thromboplastin time, …
