# Supplementary material
Source: Research Square preprint supplement (doi:10.21203/rs.3.rs-9647356/v1)
Supplement: Supplementary file 4 [file 596b71d30d5287f98c97cedd.docx]

Table S17. Multivariable analysis of AJOU-Adapted-Clinical model for 14-day mortality and 3-month unfavorable outcome

| Field | Prognostic Variable | Category | 14 Day Death | | 3 Month Unfavorable | |
| --- | --- | --- | --- | --- | --- | --- |
| OR (95% CI) | LR p-value | OR (95% CI) | LR p-value |
| Clinical | Age | Per unit increase | 1.033 (1.023-1.042) | <0.0001 | 1.039 (1.032-1.047) | <0.0001 |
| AIS (vs 3) | 4 | 4.03 (2.13-7.62) | <0.0001 | 2.52 (1.86-3.42) | <0.0001 |
| 5 | 8.77 (4.81-16.00) | 5.97 (4.46-7.97) |
| GCS score | Per unit increase | 0.86 (0.83-0.90) | <0.0001 | 0.80 (0.78-0.83) | <0.0001 |
| Pupillary light reflex | Both non-reactive | 4.78 (3.45-6.62) | <0.0001 | 4.66 (3.21-6.77) | <0.0001 |
| Injury cause (vs Fall) | Road traffic accident | 1.44 (1.07-1.93) | 0.0015 | 1.10 (0.86-1.41) | 0.0006 |
| Other non-intentional | 1.15 (0.55-2.43) | 0.42 (0.23-0.75) |
| Unknown | 0.51 (0.29-0.90) | 0.55 (0.34-0.90) |
| Pupil size | Bilateral mydriasis | 2.23 (1.45-3.44) | 0.0002 | NA | NA |
| Reference categories are indicated in the ‘Prognostic Variable’ column as (vs …).  If not indicated as ‘(vs …)’, the reference category is “Absent”.  Variables marked as ‘NA’ in the OR and LR p-value columns were not included in the respective models.  ‘LR p-value’ refers to the likelihood ratio test p-value. AIS = Abbreviated Injury Scale; LOC = Level of Consciousness | | | | | | |

Table S18. Multivariable analysis of AJOU-Adapted-Clinical model for 6-month and 12-month unfavorable outcome

| Field | Prognostic Variable | Category | 6 Month Unfavorable | | 12 Month Unfavorable | |
| --- | --- | --- | --- | --- | --- | --- |
| OR (95% CI) | LR p-value | OR (95% CI) | LR p-value |
| Clinical | Age | Per unit increase | 1.047 (1.040-1.054) | <0.0001 | 1.043 (1.035-1.052) | <0.0001 |
| AIS (vs 3) | 4 | 2.45 (1.84-3.26) | <0.0001 | 2.35 (1.63-3.41) | <0.0001 |
| 5 | 5.67 (4.32-7.45) | 6.54 (4.63-9.23) |
| GCS score | Per unit increase | 0.81 (0.79-0.83) | <0.0001 | 0.80 (0.77-0.83) | <0.0001 |
| Pupillary light reflex | Both non-reactive | 3.54 (2.47-5.08) | <0.0001 | 3.34 (2.22-5.03) | <0.0001 |
| Injury cause (vs Fall) | Road traffic accident | 1.21 (0.96-1.53) | 0.0007 | NA | NA |
| Other non-intentional | 0.67 (0.39-1.14) | NA |
| Unknown | 0.53 (0.34-0.82) | NA |
| Pupil size | Bilateral mydriasis | 3.88 (1.76-8.55) | 0.0002 | 4.24 (1.75-10.26) | 0.0004 |
| Reference categories are indicated in the ‘Prognostic Variable’ column as (vs …).  If not indicated as ‘(vs …)’, the reference category is “Absent”. Variables marked as ‘NA’ in the OR and LR p-value columns were not included in the respective models.  ‘LR p-value’ refers to the likelihood ratio test p-value. AIS = Abbreviated Injury Scale; LOC = Level of Consciousness | | | | | | |

Table S19. Multivariable analysis of AJOU-Adapted-CT model for 14-day mortality and 3-month unfavorable outcome

| Field | Prognostic Variable | Category | 14 day death | | 3 Month Unfavorable | |
| --- | --- | --- | --- | --- | --- | --- |
| OR (95% CI) | LR p-value | OR (95% CI) | LR p-value |
| Clinical | Age | Per unit increase | 1.024 (1.015-1.034) | <0.0001 | 1.032 (1.024-1.04) | <0.0001 |
| AIS (vs 3) | 4 | 4.07 (2.14-7.73) | <0.0001 | 1.98 (1.43-2.75) | <0.0001 |
| 5 | 10.34 (5.63-19.00) | 5.01 (3.56-7.03) |
| GCS score | Per unit increase | 0.87 (0.84-0.91) | <0.0001 | 0.84 (0.81-0.87) | <0.0001 |
| Pupillary light reflex | Both non-reactive | 4.67 (3.34-6.52) | <0.0001 | 4.70 (3.19-6.94) | <0.0001 |
| Injury cause (vs Fall) | Road traffic accident | 1.36 (1.00-1.84) | 0.0057 | 1.03 (0.79-1.34) | 0.0233 |
| Other non-intentional | 1.30 (0.61-2.77) | 0.48 (0.26-0.89) |
| Unknown | 0.51 (0.29-0.91) | 0.63 (0.38-1.04) |
| Pupil size | Bilateral mydriasis | 2.01 (1.29-3.13) | 0.0019 | NA | NA |
| Image | EDH | Present | 0.36 (0.26-0.52) | <0.0001 | 0.45 (0.34-0.59) | <0.0001 |
| SAH | Present | 2.16 (1.49-3.12) | <0.0001 | 1.77 (1.32-2.37) | 0.0001 |
| Diffuse axonal injury | Present | 0.12 (0.03-0.52) | 0.0002 | NA | NA |
| IVH | Present | NA | NA | 1.64 (1.17-2.30) | 0.0039 |
| Cisternal compresion | Present | NA | NA | 2.10 (1.56-2.82) | <0.0001 |
| Contusion | Present | NA | NA | 1.55 (1.16-2.06) | 0.0028 |
| Midline shift | Present | NA | NA | 1.85 (1.34-2.54) | 0.0002 |
| Reference categories are indicated in the ‘Prognostic Variable’ column as ‘(vs …)’.  If not indicated as ‘(vs …)’, the reference category is “Absent”. Variables marked as ‘NA’ in the OR and LR p-value columns were not included in the respective models.  ‘LR p-value’ refers to the likelihood ratio test p-value. AIS = Abbreviated Injury Scale; LOC = Level of Consciousness; EDH = Epidural Hemorrhage; SAH = Subarachnoid Hemorrhage; IVH = Intraventricular Hemorrhag | | | | | | |

Table S20. Multivariable analysis of AJOU-Adapted-CT model for 6-month and 12-month unfavorable outcome

| Field | Prognostic Variable | Category | 6 Month Unfavorable | | 12 Month Unfavorable | |
| --- | --- | --- | --- | --- | --- | --- |
| OR (95% CI) | LR p-value | OR (95% CI) | LR p-value |
| Clinical | Age | Per unit increase | 1.041 (1.034-1.049) | <0.0001 | 1.036 (1.027-1.045) | <0.0001 |
| AIS (vs 3) | 4 | 2.02 (1.49-2.74) | <0.0001 | 1.77 (1.19-2.63) | <0.0001 |
| 5 | 5.26 (3.83-7.22) | 5.77 (3.86-8.61) |
| GCS score | Per unit increase | 0.84 (0.82-0.87) | <0.0001 | 0.84 (0.81-0.87) | <0.0001 |
| Pupillary light reflex | Both non-reactive | 3.64 (2.51-5.28) | <0.0001 | 3.08 (2.01-4.73) | <0.0001 |
| Injury cause (vs Fall) | Road traffic accident | 1.16 (0.91-1.47) | 0.0340 | NA | NA |
| Other non-intentional | 0.81 (0.46-1.43) | NA |
| Unknown | 0.60 (0.38-0.95) | NA |
| Pupil size | Bilateral mydriasis | 3.97 (1.76-8.95) | 0.0002 | 3.80 (1.51-9.52) | 0.0017 |
| Image | EDH | Present | 0.46 (0.36-0.60) | <0.0001 | 0.42 (0.30-0.58) | <0.0001 |
| SAH | Present | 1.37 (1.05-1.80) | 0.0218 | 1.67 (1.21-2.31) | 0.0019 |
| IVH | Present | 1.79 (1.32-2.42) | 0.0001 | 1.68 (1.13-2.49) | 0.0099 |
| Cisternal compresion | Present | 1.73 (1.33-2.26) | <0.0001 | 3.30 (2.31-4.72) | <0.0001 |
| Contusion | Present | 1.71 (1.31-2.23) | <0.0001 | NA | NA |
| Midline shift | Present | 1.43 (1.08-1.90) | 0.0136 | 1.96 (1.36-2.81) | 0.0003 |
| Reference categories are indicated in the ‘Prognostic Variable’ column as ‘(vs …)’.  If not indicated as ‘(vs …)’, the reference category is “Absent”. Variables marked as ‘NA’ in the OR and LR p-value columns were not included in the respective models.  ‘LR p-value’ refers to the likelihood ratio test p-value. AIS = Abbreviated Injury Scale; LOC = Level of Consciousness; EDH = Epidural Hemorrhage; SAH = Subarachnoid Hemorrhage; IVH = Intraventricular Hemorrhag | | | | | | |

Table S21. Multivariable analysis of AJOU-Adapted-Full model for 14-day mortality and 3-month unfavorable outcome

| Field | Prognostic Variable | Category | 14 day death | | 3 Month Unfavorable | |
| --- | --- | --- | --- | --- | --- | --- |
| OR (95% CI) | LR p-value | OR (95% CI) | LR p-value |
| Clinical | Age | Per unit increase | 1.027 (1.016-1.039) | <0.0001 | 1.031 (1.023-1.040) | <0.0001 |
| AIS (vs 3) | 4 | 3.01 (1.54-5.89) | <0.0001 | 1.87 (1.33-2.64) | <0.0001 |
| 5 | 8.32 (4.44-15.60) | 4.54 (3.17-6.50) |
| GCS score | Per unit increase | 0.89 (0.85-0.94) | <0.0001 | 0.86 (0.83-0.89) | <0.0001 |
| Pupillary light reflex | Both non-reactive | 3.42 (2.36-4.97) | <0.0001 | 3.69 (2.44-5.57) | <0.0001 |
| Injury cause (vs Fall) | Road traffic accident | 1.29 (0.92-1.82) | 0.0105 | 1.16 (0.88-1.53) | 0.0381 |
| Other non-intentional | 1.91 (0.84-4.34) | 0.6 (0.32-1.12) |
| Unknown | 0.50 (0.27-0.93) | 0.63 (0.37-1.06) |
| Pupil size | Bilateral mydriasis | 1.90 (1.15-3.14) | 0.0119 | NA | NA |
| Image | EDH | Present | 0.35 (0.24-0.52) | <0.0001 | 0.45 (0.34-0.61) | <0.0001 |
| SAH | Present | 1.95 (1.29-2.93) | 0.0010 | 1.81 (1.33-2.45) | 0.0001 |
| Diffuse axonal injury | Present | 0.14 (0.03-0.67) | 0.0021 | NA | NA |
| IVH | Present | NA | NA | 1.61 (1.13-2.29) | 0.0079 |
| Cisternal compresion | Present | NA | NA | 1.80 (1.31-2.47) | 0.0002 |
| Contusion | Present | NA | NA | 1.70 (1.25-2.30) | 0.0006 |
| Midline shift | Present | NA | NA | 1.67 (1.19-2.34) | 0.0029 |
| Lab | aPTT | Spline | Nonlinear (df=4) | <0.0001 | Nonlinear (df=4) | <0.0001 |
| CRP | Spline | Nonlinear (df=4) | <0.0001 | Nonlinear (df=4) | 0.0007 |
| Sodium | Spline | Nonlinear (df=4) | 0.0038 | Nonlinear (df=4) | 0.0049 |
| Platelet | Spline | Nonlinear (df=4) | 0.0067 | NA | NA |
| AST | Spline | Nonlinear (df=4) | 0.0005 | NA | NA |
| Alk.Phosphatase | Spline | NA | NA | Nonlinear (df=4) | 0.0001 |
| Reference categories are indicated in the ‘Prognostic Variable’ column as (vs …).  If not indicated as ‘(vs …)’, the reference category is “Absent”. ‘Spline’ denotes variables analyzed as nonlinear terms in models.  Lab variables modeled with splines do not yield a single odds ratio; therefore, reported as ‘Nonlinear (df = 4)’ in the OR column. Variables marked as ‘NA’ in the OR and LR p-value columns were not included in the respective models.  ‘LR p-value’ refers to the likelihood ratio test p-value. AIS = Abbreviated Injury Scale; LOC = Level of Consciousness; EDH = Epidural Hemorrhage; SAH = Subarachnoid Hemorrhage; IVH = Intraventricular Hemorrhage | | | | | | |

Table S22. Multivariable analysis of AJOU-Adapted-Full model for 6-month and 12-month unfavorable outcome

| Field | Prognostic Variable | Category | 6 Month Unfavorable | | 12 Month Unfavorable | |
| --- | --- | --- | --- | --- | --- | --- |
| OR (95% CI) | LR p-value | OR (95% CI) | LR p-value |
| Clinical | Age | Per unit increase | 1.036 (1.028-1.044) | <0.0001 | 1.033 (1.023-1.043) | <0.0001 |
| AIS (vs 3) | 4 | 1.96 (1.43-2.70) | <0.0001 | 1.66 (1.09-2.53) | <0.0001 |
| 5 | 5.27 (3.76-7.40) | 5.05 (3.28-7.78) |
| GCS score | Per unit increase | 0.85 (0.83-0.88) | <0.0001 | 0.86 (0.83-0.90) | <0.0001 |
| Pupillary light reflex | Both non-reactive | 2.64 (1.77-3.94) | <0.0001 | 2.23 (1.39-3.55) | 0.0007 |
| Injury cause (vs Fall) | Road traffic accident | 1.31 (1.01-1.70) | 0.0122 | NA | NA |
| Other non-intentional | 0.97 (0.54-1.75) | NA |
| Unknown | 0.60 (0.37-0.98) | NA |
| Pupil size | Bilateral mydriasis | 3.50 (1.42-8.63) | 0.0031 | 3.49 (1.28-9.57) | 0.0087 |
| Image | EDH | Present | 0.46 (0.35-0.60) | <0.0001 | 0.41 (0.29-0.58) | <0.0001 |
| SAH | Present | 1.42 (1.07-1.89) | 0.0150 | 1.61 (1.14-2.27) | 0.0062 |
| IVH | Present | 1.72 (1.25-2.36) | 0.0008 | 1.59 (1.04-2.43) | 0.0313 |
| Cisternal compresion | Present | 1.51 (1.13-2.01) | 0.0050 | 2.97 (2.02-4.37) | <0.0001 |
| Contusion | Present | 1.90 (1.43-2.52) | <0.0001 | NA | NA |
| Midline shift | Present | 1.33 (0.98-1.8) | 0.0655 | 1.82 (1.23-2.69) | 0.0025 |
| Lab | aPTT | Spline | Spline (df=4) | <0.0001 | Spline (df=4) | <0.0001 |
| CRP | Spline | Spline (df=4) | 0.0002 | Spline (df=4) | <0.0001 |
| Alk.Phosphatase | Spline | Spline (df=4) | 0.0028 | Spline (df=4) | <0.0001 |
| Albumin | Spline | Spline (df=4) | 0.0033 | Spline (df=4) | 0.0343 |
| Sodium | Spline | Spline (df=4) | 0.0471 | NA | NA |
| BUN | Spline | Spline (df=4) | 0.0203 | NA | NA |
| Reference categories are indicated in the ‘Prognostic Variable’ column as (vs …).  If not indicated as ‘(vs …)’, the reference category is “Absent”. ‘Spline’ denotes variables analyzed as nonlinear terms in models.  Lab variables modeled with splines do not yield a single odds ratio; therefore, reported as ‘Nonlinear (df = 4)’ in the OR column.  Variables marked as ‘NA’ in the OR and LR p-value columns were not included in the respective models.  ‘LR p-value’ refers to the likelihood ratio test p-value. AIS = Abbreviated Injury Scale; LOC = Level of Consciousness; EDH = Epidural Hemorrhage; SAH = Subarachnoid Hemorrhage; IVH = Intraventricular Hemorrhage; BUN= Blood Urea Nitrogen | | | | | | |
