# Supplementary material
Source: Research Square preprint supplement (doi:10.21203/rs.3.rs-9647356/v1)
Supplement: Supplementary file 5 [file f002c75127ed649792ff4156.docx]

Table S13. Performance of AJOU-Base models for 14-day mortality on internal AJOU (train/test split) dataset

|  | Model | AJOU-Base-Clinical | AJOU-Base-CT | AJOU-Base-Full |
| --- | --- | --- | --- | --- |
| Model Info. | No. of variables | 6 | 9 | 14 |
| Regularization | Lasso (λ=0.014) | Elastic Net (α=0.6, λ=0.011) | Lasso (λ=0.009) |
| Train (AJOU) | events / patients (%) | 299 / 2312 (12.9%) | | |
| AUROC | 0.892 | 0.908 | 0.923 |
| Brier score | 0.076 | 0.071 | 0.063 |
| Calibration slope | 1.187 | 1.185 | 1.240 |
| Calibration intercept | 0 | 0 | 0 |
| Test  (AJOU) | events / patients (%) | 74 / 577 (12.8%) | | |
| AUROC | 0.895 | 0.902 | 0.908 |
| Brier score | 0.074 | 0.072 | 0.067 |
| Calibration slope | 1.224 | 1.167 | 1.056 |
| Calibration intercept | -0.026 | -0.066 | -0.139 |
| The AJOU dataset was randomly partitioned into training and test sets in a 1:4 ratio, maintaining a comparable event-to-patient distribution across subsets. Following internal validation, the final models were refitted using the entire AJOU dataset.  Info. = Information; AUROC = Area Under the Receiver Operating Characteristic curve | | | | |

Table S14. Performance of AJOU-Base models for 3-month unfavorable outcome on internal AJOU (train/test split) dataset

|  | Model | AJOU-Base-Clinical | AJOU-Base-CT | AJOU-Base-Full |
| --- | --- | --- | --- | --- |
| Model Info. | No. of variables | 6 | 12 | 16 |
| Regularization | Lasso (λ=0.03) | Lasso (λ=0.025) | Lasso (λ=0.02) |
| Train (AJOU) | events / patients (%) | 771 / 1849 (41.7%) | | |
| AUROC | 0.881 | 0.899 | 0.909 |
| Brier score | 0.138 | 0.127 | 0.120 |
| Calibration slope | 1.409 | 1.396 | 1.361 |
| Calibration intercept | 0 | 0 | 0 |
| Test  (AJOU) | events / patients (%) | 192 / 461 (41.6%) | | |
| AUROC | 0.904 | 0.908 | 0.921 |
| Brier score | 0.130 | 0.122 | 0.113 |
| Calibration slope | 1.698 | 1.518 | 1.523 |
| Calibration intercept | -0.012 | -0.037 | -0.015 |
| The AJOU dataset was randomly partitioned into training and test sets in a 1:4 ratio, maintaining a comparable event-to-patient distribution across subsets. Following internal validation, the final models were refitted using the entire AJOU dataset.  Info. = Information; AUROC = Area Under the Receiver Operating Characteristic curve | | | | |

Table S15. Performance of AJOU-Base models for 6-month unfavorable outcome on internal AJOU (train/test split) dataset

|  | Model | AJOU-Base-Clinical | AJOU-Base-CT | AJOU-Base-Full |
| --- | --- | --- | --- | --- |
| Model Info. | No. of variables | 7 | 13 | 19 |
| Regularization | Lasso (λ=0.025) | Elastic Net (α=0.3, λ=0.05) | Elastic Net (α=0.5, λ=0.04) |
| Train (AJOU) | events / patients (%) | 830 / 2178 (38.1%) | | |
| AUROC | 0.878 | 0.893 | 0.903 |
| Brier score | 0.137 | 0.129 | 0.123 |
| Calibration slope | 1.372 | 1.446 | 1.498 |
| Calibration intercept | 0 | 0 | 0 |
| Test  (AJOU) | events / patients (%) | 207 / 544 (38.1%) | | |
| AUROC | 0.892 | 0.903 | 0.907 |
| Brier score | 0.132 | 0.124 | 0.118 |
| Calibration slope | 1.403 | 1.500 | 1.465 |
| Calibration intercept | -0.008 | -0.020 | -0.015 |
| The AJOU dataset was randomly partitioned into training and test sets in a 1:4 ratio, maintaining a comparable event-to-patient distribution across subsets. Following internal validation, the final models were refitted using the entire AJOU dataset.  Info. = Information; AUROC = Area Under the Receiver Operating Characteristic curve | | | | |

Table S16. Performance of AJOU-Base models for 12-month unfavorable outcome on internal AJOU (train/test split) dataset

|  | Model | AJOU-Base-Clinical | AJOU-Base-CT | AJOU-Base-Full |
| --- | --- | --- | --- | --- |
| Model Info. | No. of variables | 6 | 12 | 16 |
| Regularization | Lasso (λ=0.025) | Elastic Net (α=0.4, λ=0.04) | Ridge (λ=0.08) |
| Train (AJOU) | events / patients (%) | 576 / 1462 (39.4%) | | |
| AUROC | 0.895 | 0.911 | 0.927 |
| Brier score | 0.125 | 0.115 | 0.103 |
| Calibration slope | 1.327 | 1.391 | 1.421 |
| Calibration intercept | 0 | 0 | 0 |
| Test  (AJOU) | events / patients (%) | 144 / 365 (39.5%) | | |
| AUROC | 0.912 | 0.930 | 0.936 |
| Brier score | 0.113 | 0.102 | 0.094 |
| Calibration slope | 1.361 | 1.522 | 1.434 |
| Calibration intercept | -0.021 | 0.023 | 0.090 |
| The AJOU dataset was randomly partitioned into training and test sets in a 1:4 ratio, maintaining a comparable event-to-patient distribution across subsets. Following internal validation, the final models were refitted using the entire AJOU dataset.  Info. = Information; AUROC = Area Under the Receiver Operating Characteristic curve | | | | |
