# Supplementary material
Source: Research Square preprint supplement (doi:10.21203/rs.3.rs-9647356/v1)
Supplement: Supplementary file 6 [file c8728151d388599bfbb74410.xlsx]

## Sheet: Table S7
Table S7. Pearson's Correlation Matrix of Continuous Variables
	1	2	3	4	5	6	7	8	9	10	11	12	13	14	15	16	17	18	19	20	21	22	23	24	25	26	27	28	29	30
1. PT	1	-	-	-	-	-	-	-	-	-	-	-	-	-	-	-	-	-	-	-	-	-	-	-	-	-	-	-	-	-
2. aPTT	0.664256	1	-	-	-	-	-	-	-	-	-	-	-	-	-	-	-	-	-	-	-	-	-	-	-	-	-	-	-	-
3. INR	0.956384	0.569422	1	-	-	-	-	-	-	-	-	-	-	-	-	-	-	-	-	-	-	-	-	-	-	-	-	-	-	-
4. ISS score	0.148775	0.266189	0.157753	1	-	-	-	-	-	-	-	-	-	-	-	-	-	-	-	-	-	-	-	-	-	-	-	-	-	-
5. Glucose	0.172264	0.238684	0.156217	0.312043	1	-	-	-	-	-	-	-	-	-	-	-	-	-	-	-	-	-	-	-	-	-	-	-	-	-
6. Albumin	-0.252625	-0.372048	-0.288463	-0.359046	-0.240048	1	-	-	-	-	-	-	-	-	-	-	-	-	-	-	-	-	-	-	-	-	-	-	-	-
7. AST	0.237607	0.165124	0.110838	0.144388	0.103014	-0.153631	1	-	-	-	-	-	-	-	-	-	-	-	-	-	-	-	-	-	-	-	-	-	-	-
8. Lactic acid*	0.163884	0.268742	0.136056	0.31959	0.288695	-0.187483	0.146336	1	-	-	-	-	-	-	-	-	-	-	-	-	-	-	-	-	-	-	-	-	-	-
9. T. CO2	-0.170418	-0.229886	-0.220009	-0.335592	-0.283406	0.291564	-0.229488	-0.358703	1	-	-	-	-	-	-	-	-	-	-	-	-	-	-	-	-	-	-	-	-	-
10.T. Cholesterol	-0.178309	-0.220057	-0.213772	-0.189899	-0.102747	0.461746	-0.0247651	-0.0776134	0.157836	1	-	-	-	-	-	-	-	-	-	-	-	-	-	-	-	-	-	-	-	-
11. Calcium	-0.21549	-0.298997	-0.24535	-0.381354	-0.158406	0.758395	-0.195377	-0.212099	0.395864	0.387403	1	-	-	-	-	-	-	-	-	-	-	-	-	-	-	-	-	-	-	-
12. Potassium	0.00260343	-0.0255288	0.0106137	-0.176219	-0.0271554	0.0925209	0.0540853	-0.150615	0.0730669	-0.0181092	0.220286	1	-	-	-	-	-	-	-	-	-	-	-	-	-	-	-	-	-	-
13. T. protein	-0.204126	-0.336756	-0.236006	-0.378746	-0.213639	0.833014	-0.125626	-0.172832	0.304752	0.435676	0.747627	0.146894	1	-	-	-	-	-	-	-	-	-	-	-	-	-	-	-	-	-
14. SBP	-0.0285298	-0.0498633	-0.0484788	0.0200687	0.0504384	0.186549	-0.0639407	-0.0664395	0.124506	0.105383	0.221347	0.0595324	0.255104	1	-	-	-	-	-	-	-	-	-	-	-	-	-	-	-	-
15. Hemoglobin	-0.205761	-0.246243	-0.226481	-0.216005	-0.173734	0.623012	-0.0771851	-0.106285	0.156737	0.391528	0.443937	0.00616231	0.499943	0.0918616	1	-	-	-	-	-	-	-	-	-	-	-	-	-	-	-
16. CRP	0.0629902	0.13647	0.0957189	0.382794	0.206282	-0.221303	0.0668994	0.127132	-0.234208	-0.102597	-0.241773	-0.169132	-0.236757	0.000982613	-0.0962085	1	-	-	-	-	-	-	-	-	-	-	-	-	-	-
17. Platelet	-0.114478	-0.129852	-0.147713	-0.0321965	-0.0366848	0.284064	-0.0662733	-0.0823959	0.0142617	0.222419	0.240469	0.000812824	0.204214	0.0356138	0.240672	0.00709964	1	-	-	-	-	-	-	-	-	-	-	-	-	-
18. Chloride	0.032229	0.105906	0.102756	0.134095	-0.149676	-0.255389	-0.0927648	0.0216393	-0.153664	-0.163113	-0.300153	-0.101906	-0.355062	-0.14746	-0.0972997	0.0636693	-0.00657412	1	-	-	-	-	-	-	-	-	-	-	-	-
19. HR	0.0492971	0.08809	0.0611923	0.181266	0.239132	-0.151829	0.163475	0.170581	-0.257746	-0.0568279	-0.161538	-0.0215626	-0.122049	-0.0256979	-0.0786913	0.132959	0.048939	-0.0410735	1	-	-	-	-	-	-	-	-	-	-	-
20. DBP	-0.0322775	-0.0271627	-0.0440779	0.0640079	0.0392185	0.145466	-0.0322563	-0.0323441	0.0917095	0.123656	0.161832	0.012242	0.186377	0.67566	0.139306	0.0342293	0.0747648	-0.117762	0.0722203	1	-	-	-	-	-	-	-	-	-	-
21. RR	0.0458193	0.0894234	0.0635107	0.255633	0.162886	-0.131283	0.0946528	0.155647	-0.1874	-0.0678381	-0.130917	-0.0727104	-0.116818	0.0297865	-0.0707095	0.154956	0.0242375	0.0133209	0.254508	0.0643903	1	-	-	-	-	-	-	-	-	-
22. ALT	0.244828	0.147839	0.0935432	0.113158	0.10074	-0.0967482	0.925444	0.113994	-0.166652	-0.0069215	-0.142946	0.0657275	-0.088546	-0.0394205	-0.028973	0.0537002	-0.0236497	-0.0761647	0.130649	-0.0159576	0.0673516	1	-	-	-	-	-	-	-	-
23. Age	0.0440022	0.0295008	0.0365913	-0.0345029	0.0837544	-0.156525	-0.0882902	-0.0584129	0.1672	-0.0980523	0.0710329	0.189212	0.00392738	0.269487	-0.296793	-0.0574864	-0.241048	-0.13137	-0.0983079	0.109792	-0.0360252	-0.0836602	1	-	-	-	-	-	-	-
24. Creatinine	0.118753	0.0657062	0.0491456	0.0178336	0.0832953	-0.0900149	0.282313	-0.00733174	-0.0505118	-0.0804576	-0.0130285	0.290081	-0.000217811	0.0824099	-0.179683	0.0270571	-0.088292	-0.208064	0.0596953	0.00851049	-0.0127629	0.315303	0.0823699	1	-	-	-	-	-	-
25. LD	0.0253956	0.0887887	0.0445123	0.0786924	0.0610702	-0.0308356	0.0741798	0.0447858	-0.0530285	-0.00402263	-0.109126	-0.0784036	-0.103144	-0.178013	0.0451953	0.0705337	0.113722	0.0361348	0.0601825	-0.136383	0.0284952	0.0221704	-0.173085	-0.0459531	1	-	-	-	-	-
26. Sodium	-0.065968	-0.0227258	0.00926075	0.0155268	-0.178151	0.0615455	-0.0144961	0.105299	0.0485546	0.0324115	-0.0188207	-0.158293	-0.0341067	-0.114763	0.137664	0.0106447	0.0271385	0.699304	-0.000852801	-0.0802996	-0.00962393	-0.0152045	-0.195914	-0.126532	0.084563	1	-	-	-	-
27. Creatine kinase	0.0130883	0.0220388	0.0232299	0.0719266	-0.0124152	-0.0569074	0.20258	0.0144908	-0.121457	-0.0231865	-0.101505	0.0339937	-0.0621397	-0.0826635	0.0167785	0.0491597	-0.0375748	-0.0841896	0.102719	-0.0402295	0.0604621	0.0866276	-0.0748254	0.0630337	0.0286345	-0.0425764	1	-	-	-
28. WBC	0.0815182	0.0557366	0.0311104	0.186286	0.221378	0.00935621	0.0408059	0.158264	-0.176979	0.0202771	-0.0988482	-0.129067	-0.0583185	-0.0427201	0.0473373	0.172512	0.195593	-0.00540244	0.116147	-0.0115772	0.0864119	0.0517123	-0.217536	-0.0350885	0.0602695	-0.00887779	0.0611158	1	-	-
29. Magnesium	-0.00916651	0.0345792	-0.0314865	-0.0748038	-0.00793152	0.200798	0.0135337	-0.0181067	0.074285	0.134934	0.241745	0.205312	0.195014	0.0202895	0.145161	-0.0490337	0.11289	-0.0536459	-0.0731578	0.01706	-0.00378803	0.0285636	0.0937296	0.218398	0.0779353	0.0555963	0.0137908	-0.0616519	1	-
30. Hours since injury	-0.00188713	-0.0488429	0.0282086	-0.131479	-0.0680762	0.02843	0.00675203	-0.0488046	0.00620954	-0.0414189	-0.00833102	0.126876	0.0406247	-0.0488018	-0.0451377	-0.095136	-0.0981383	-0.0779731	0.0204938	-0.0715682	-0.0496957	0.00579105	0.0866338	0.0353399	-0.0577508	-0.0479254	0.124167	0.0564921	-0.0712286	1
The table shows the Pearson's correlation coefficient of 30 continuous variables used as potential predictors of poor outcomes following TBI in univariable analysis. Correlation coefficients > 0.3 are displayed in bold, and > 0.5 are displayed in bold red. PT: Prothrombin time, aPTT: activated Partial Thromboplastin time, INR: International normalized ratio, ISS: Injury severity score, AST: Aspar…

## Sheet: Table S8
Table S8. Eta-Squared Matrix of Continuous Variables
	Sex	Injury Cause	Injury Mechanism	LOC	GCS eye	GCS verbal	GCS motor	MMT (upper)	MMT (lower)	Pupil size	Pupil reactivity	EDH	SDH	Contusion	DAI	SAH	IVH	Midline shift	Cisternal compression	Marshall score	Head/neck AIS	Basilar fracture	Calvarial fracture	Facial fracture	Ethanol intoxication
1. PT	0.000441517	0.00187589	0.00321121	0.0447221	0.0253367	0.0260477	0.0396531	0.0410428	0.0421132	0.0423095	0.0429768	0.00161946	0.00600449	0.000339048	1.26508e-07	0.00352822	0.00528812	0.0089493	0.0153734	0.027473	0.016244	0.00134974	0.00351232	0.000735278	0.00356573
2. aPTT	0.000838451	0.00327919	0.0105493	0.134732	0.0761394	0.0762602	0.130896	0.106577	0.107452	0.0875218	0.116305	0.00206064	0.011475	0.00071442	0.000175787	0.0096816	0.0125966	0.017533	0.0293901	0.0485731	0.0325763	0.00447098	0.00576467	0.000206054	0.00962854
3. INR	0.00256714	0.00181476	0.00188777	0.0801951	0.0482546	0.0554126	0.0729777	0.060479	0.0637667	0.070621	0.0664618	0.002359	0.00472041	1.35739e-05	6.35641e-06	0.000395972	0.00892376	0.0155855	0.00517892	0.0307437	0.02551	0.00243741	0.00182476	7.22256e-05	0.00341502
4. ISS score	0.00912897	0.018512	0.0904636	0.323482	0.272666	0.280648	0.260852	0.218081	0.238938	0.126487	0.175008	0.0351296	0.0883252	0.0407261	0.00277456	0.045219	0.0629394	0.180587	0.101533	0.424379	0.651451	0.056667	0.090866	0.00798791	0.123213
5. Glucose	9.60263e-05	0.00304047	0.0137481	0.113732	0.105151	0.100622	0.102132	0.0711145	0.0840206	0.0547297	0.0811322	0.000134818	0.0267395	0.00809294	3.89127e-06	0.0163917	0.0173943	0.01792	0.0319421	0.0575242	0.0634356	0.0065542	0.0111254	0.000479364	0.0189581
6. Albumin	0.00241079	0.0100789	0.0146339	0.135725	0.114698	0.136574	0.13425	0.106761	0.108319	0.0593727	0.0967669	0.00240801	0.015732	0.00182097	0.00117353	0.00891524	0.0326398	0.0147296	0.0212245	0.0554102	0.044219	0.0134744	0.003736	0.00900272	0.0269342
7. AST	0.00122321	0.0201446	0.0165037	0.0755215	0.0621651	0.0613629	0.0640236	0.0593528	0.0678795	0.0231486	0.0538878	0.000507149	0.00243281	0.000628858	0.000538588	0.000339803	0.0111875	0.00405056	0.00832361	0.0195578	0.0157491	0.00553167	5.06632e-07	0.00818248	0.0251245
8. Lactic acid*	0.00063443	0.00888438	0.0121693	0.121137	0.0758754	0.0756896	0.106758	0.100826	0.105744	0.0339198	0.0776101	5.41932e-05	0.00974278	0.00304823	0.00338238	0.0187717	0.00488731	0.0413881	0.00154821	0.0762889	0.0764158	0.00373022	0.00812681	0.000553567	0.0364808
9. T. CO2	0.00332831	0.0118397	0.0164974	0.184094	0.156754	0.159424	0.160568	0.100166	0.117227	0.073181	0.103512	0.00158063	0.00712617	0.00648286	0.001781	0.0160085	0.0133232	0.0148597	0.0307742	0.0735199	0.0642603	0.0139002	0.0244754	0.00612309	0.104857
10.T. Cholesterol	0.00153612	0.000205141	0.00010359	0.0269927	0.0253248	0.0298691	0.0272205	0.0251861	0.0249299	0.0126589	0.023823	0.00284343	0.0060948	0.000258726	0.000145273	0.00197701	0.0101529	0.00396447	0.00476837	0.0220442	0.016032	0.00061771	9.11064e-07	0.00169709	0.00794474
11. Calcium	0.00142939	0.016097	0.0279249	0.21161	0.197171	0.207683	0.204362	0.139863	0.147144	0.0701897	0.114986	0.00119449	0.00980982	0.00735638	0.00547796	0.0138743	0.0281178	0.0213363	0.0212366	0.0699531	0.0632358	0.0348542	0.0313278	0.0154418	0.0717491
12. Potassium	0.000361129	0.0134352	0.0321143	0.0674197	0.0540085	0.05383	0.0445461	0.0186483	0.0201921	0.0171126	0.0174115	0.0127531	0.00468976	0.0171052	1.45419e-05	0.0104935	0.000134545	0.0164304	0.0107253	0.0271299	0.0251857	0.0296566	0.039053	0.00937599	0.0419725
13. T. protein	0.000611196	0.0291693	0.057907	0.150226	0.140626	0.14783	0.148634	0.105372	0.111594	0.064782	0.106747	0.00045471	0.00894797	0.00321051	0.00470555	0.0162455	0.0314759	0.00732118	0.018846	0.0413827	0.0337164	0.0318937	0.018537	0.0222897	0.0550692
14. SBP	0.129936	0.00878856	0.00735343	0.0397109	0.0291892	0.0491069	0.044143	0.0378397	0.0333788	0.019527	0.035536	0.00945528	0.0131907	0.000218846	1.56029e-05	0.000222446	0.0103317	0.0153804	0.00725007	0.0364739	0.0247184	1.79711e-05	0.00129706	1.8777e-05	0.0171146
15. Hemoglobin	0.00406738	0.0255562	0.0436527	0.201701	0.174183	0.17798	0.164235	0.112014	0.125686	0.0925864	0.126958	0.000898292	0.0320319	0.0195554	0.00125935	0.0377317	0.0154302	0.0417169	0.0442914	0.105701	0.107189	0.0307341	0.0316665	0.00573081	0.0752596
16. CRP	1.53741e-05	0.0126254	0.0177181	0.00493288	0.00160449	0.00466605	0.00321858	0.00774675	0.00782787	0.00127001	0.00349938	0.013248	0.00745374	0.00352327	0.00449331	0.000261826	0.00353983	0.000428329	0.000127728	0.00789471	0.00371996	0.0077603	0.00574603	0.000549886	0.00800977
17. Platelet	0.000208883	0.0303935	0.0642983	0.022683	0.0230797	0.0194506	0.0209188	0.0154692	0.0134517	0.00542167	0.00828374	0.0048142	0.000795962	0.00144942	0.00285048	0.00486562	6.1476e-05	5.17494e-05	0.0019998	0.00230311	0.00164705	0.0179105	0.0181228	0.00887826	0.0246657
18. Chloride	1.69085e-05	0.0183269	0.0163784	0.00252183	0.000654531	0.00663135	0.0020504	0.000849407	0.00178139	0.00236845	0.000404852	0.00348238	0.0154577	0.00182693	0.000263027	0.00328926	0.00205268	0.0309115	0.000784849	0.0307415	0.0150725	0.00577582	0.000486543	0.0163127	0.0352183
19. HR	0.000251102	0.0047984	0.00753384	0.00382884	0.00307846	0.00233026	0.00138147	0.00164929	0.00301613	0.00138183	0.000685021	2.69078e-05	0.00945239	0.00047227	0.000749373	0.00454595	0.00369713	0.0219042	0.000458381	0.022006	0.0120136	8.55385e-05	3.33215e-05	0.0106348	0.0321239
20. DBP	0.000264485	0.00545091	0.0034229	0.0699496	0.0734788	0.0755262	0.0758196	0.0394227	0.0429457	0.0146299	0.0296422	0.000898608	0.000735611	0.00271082	0.00626059	0.00293128	0.0128037	0.00359278	0.0110477	0.0166072	0.0127099	0.000111837	0.000645731	0.00294403	0.0106576
21. RR	6.99061e-06	0.00786234	0.0185	0.0633451	0.0448612	0.0502299	0.048671	0.0157123	0.0222128	0.00646874	0.0108426	0.00211315	0.00692622	0.0146009	0.00112951	0.0159383	0.00595004	0.00996709	0.0125304	0.035541	0.0344442	0.00767982	0.0156669	0.00219273	0.0408203
22. ALT	6.6752e-05	0.0225333	0.0144775	0.0396051	0.0347623	0.0330612	0.0320489	0.028767	0.0352327	0.0142365	0.0296172	0.000142969	0.000799039	8.90004e-05	0.000231398	5.42126e-05	0.00205246	0.00143753	0.00426223	0.00860233	0.00747455	0.0072179	1.97242e-07	0.00620335	0.00915165
23. Age	0.0182332	0.0923175	0.117116	0.0098934	0.0128608	0.006409	0.00720082	0.00330595	0.00204109	0.00570976	0.000622131	0.0485914	0.0614794	2.34417e-05	0.0106198	0.00134285	0.0064077	0.00760107	0.000341568	0.0190926	0.00781706	0.0382138	0.0280437	0.0250961	0.0668001
24. Creatinine	0.0034156	0.00864287	0.0184339	0.00147971	0.00052243	0.00509989	0.0051231	0.00309454	0.00172332	0.00594497	0.00500842	0.0058648	0.00017274	0.000111421	0.000372188	0.00223705	0.00109738	0.00030356	4.37729e-05	0.00464114	0.00317441	0.00522804	0.00662502	0.00177601	0.0112701
25. LD	0.0144232	0.0194466	0.0202526	0.0280714	0.0280923	0.034694	0.0330551	0.032327	0.0293863	0.0624005	0.0708724	0.0113138	0.0122708	0.0240573	0.000824676	0.00680411	0.00713496	0.0048219	0.0177618	0.0543774	0.00938342	0.0162928	0.0262574	0.00775955	0.0300595
26. Sodium	0.000614757	0.0112767	0.0168602	0.00721472	0.0090556	0.0045335	0.00750828	0.00275396	0.00393057	0.000748573	0.00233616	0.0036776	0.0036906	0.000312879	0.000282771	0.00196972	9.31804e-05	0.000198605	0.00270256	0.00542943	0.0032711	0.00864965	0.00558861	0.00918034	0.0437113
27. Creatine kinase	0.0047987	0.000105837	0.00165992	0.00411353	0.00289061	0.00358867	0.00369596	0.00719641	0.00453442	0.00589653	0.00266269	9.40125e-06	2.32542e-05	0.000889344	0.000510347	0.00253352	0.00166536	1.8381e-06	0.000120377	0.00580026	0.00114663	0.00018516	1.32406e-05	0.00646686	0.00135011
28. WBC	0.00147827	0.00830415	0.0266476	0.0313636	0.027366	0.0266012	0.0225676	0.0111616	0.0154811	0.023217	0.0256239	0.0084763	6.11709e-05	0.00444887	0.00129471	0.00229045	0.00402972	0.00635044	0.00370691	0.0166311	0.0182308	0.0124076	0.018721	0.011285	0.00694127
29. Magnesium	0.000623165	0.00731939	0.0125509	0.0159517	0.0129472	0.0142941	0.012479	0.00256851	0.00260325	0.00183859	0.00616438	0.00106914	0.000184755	0.00275614	0.000425636	0.000328689	0.000453428	0.000810893	3.31792e-05	0.00731684	0.00922376	0.0033145	0.00410776	0.00901879	0.0099304
30. Hours since injury	0.00200775	0.0129966	0.0248864	0.0262334	0.0173823	0.0430995	0.0172185	0.0107897	0.0120369	0.00755534	0.00754585	0.000446462	0.00300792	0.00457756	3.40766e-05	0.00917445	5.51906e-05	0.00169459	0.00663866	0.00555928	0.00218672	0.00901191	0.00594153	6.18128e-05	0.0270785
The table shows the Eta-Squared correlation ratio of 30 continuous variables with 25 categorical variables used as potential predictors of poor outcomes following TBI in univariable analysis. Correlation coefficients > 0.06 are displayed in bold, and > 0.14 are displayed in bold red. PT: Prothrombin time, aPTT: activated Partial Thromboplastin time, INR: International normalized ratio, ISS: Injur…

## Sheet: Table S9
Table S9: Cramér’s V Correlation Matrix for Categorical Variables
	1	2	3	4	5	6	7	8	9	10	11	12	13	14	15	16	17	18	19	20	21	22	23	24	25
1. Sex	1	-	-	-	-	-	-	-	-	-	-	-	-	-	-	-	-	-	-	-	-	-	-	-	-
2. Injury Cause	0.102689	1	-	-	-	-	-	-	-	-	-	-	-	-	-	-	-	-	-	-	-	-	-	-	-
3. Injury Mechanism	0.19887	0.704148	1	-	-	-	-	-	-	-	-	-	-	-	-	-	-	-	-	-	-	-	-	-	-
4. LOC	0.103419	0.108817	0.129079	1	-	-	-	-	-	-	-	-	-	-	-	-	-	-	-	-	-	-	-	-	-
5. GCS eye	0.0828926	0.123601	0.133451	0.698614	1	-	-	-	-	-	-	-	-	-	-	-	-	-	-	-	-	-	-	-	-
6. GCS verbal	0.0812817	0.11445	0.125785	0.58359	0.64265	1	-	-	-	-	-	-	-	-	-	-	-	-	-	-	-	-	-	-	-
7. GCS motor	0.0663385	0.0964375	0.103377	0.629383	0.613211	0.550697	1	-	-	-	-	-	-	-	-	-	-	-	-	-	-	-	-	-	-
8. MMT (upper)	0.0427527	0.098797	0.113397	0.537755	0.492645	0.494732	0.531375	1	-	-	-	-	-	-	-	-	-	-	-	-	-	-	-	-	-
9. MMT (lower)	0.0444693	0.103461	0.117659	0.534359	0.497387	0.500177	0.526128	0.773299	1	-	-	-	-	-	-	-	-	-	-	-	-	-	-	-	-
10. Pupil size	0.0487546	0.0533682	0.0898043	0.336653	0.287801	0.28184	0.309989	0.34005	0.337425	1	-	-	-	-	-	-	-	-	-	-	-	-	-	-	-
11. Pupil reactivity	0.0323095	0.109044	0.122961	0.472424	0.425846	0.408023	0.443999	0.435533	0.42598	0.556676	1	-	-	-	-	-	-	-	-	-	-	-	-	-	-
12. EDH	0.149891	0.0577697	0.168111	0.0739648	0.0550798	0.0775899	0.0563982	0.0718952	0.0660007	0.0587532	0.0707214	1	-	-	-	-	-	-	-	-	-	-	-	-	-
13. SDH	0.000759935	0.162675	0.152786	0.269322	0.218399	0.258981	0.218214	0.196404	0.206094	0.138655	0.172143	0.107878	1	-	-	-	-	-	-	-	-	-	-	-	-
14. Contusion	0.0990599	0.122675	0.152854	0.283741	0.235537	0.231706	0.207501	0.0999882	0.0965841	0.0686108	0.0766952	0.0563081	0.150507	1	-	-	-	-	-	-	-	-	-	-	-
15. DAI	0.00554519	0.132853	0.134696	0.176819	0.161572	0.18757	0.1854	0.114255	0.100049	0.0632948	0.0891806	0.0369807	0.0596199	0.0592618	1	-	-	-	-	-	-	-	-	-	-
16. SAH	0.0629159	0.137117	0.172616	0.289145	0.253212	0.266837	0.229909	0.1767	0.184359	0.123338	0.138969	0.000459293	0.181469	0.342941	0.0156151	1	-	-	-	-	-	-	-	-	-
17. IVH	0.0705759	0.0952124	0.101757	0.264457	0.253919	0.282537	0.245492	0.261289	0.25117	0.148303	0.193046	0.0614609	0.0654572	0.160999	0.182312	0.181777	1	-	-	-	-	-	-	-	-
18. Midline shift	0.0199796	0.0958623	0.117861	0.317965	0.286502	0.313795	0.297265	0.304315	0.300544	0.262854	0.269205	0.0720185	0.193142	0.0446456	0.051773	0.0675216	0.0982767	1	-	-	-	-	-	-	-
19. Cisternal compression	0.0108469	0.0782408	0.0908148	0.31109	0.271882	0.290765	0.279998	0.243502	0.248645	0.187299	0.211928	0.0110818	0.202542	0.190495	0.0262841	0.257231	0.177482	0.0148936	1	-	-	-	-	-	-
20. Marshall score	0.0745715	0.125772	0.128998	0.256276	0.26108	0.221362	0.208459	0.297962	0.30304	0.194486	0.291447	0.168216	0.390844	0.260051	0.100041	0.299931	0.210406	0.801152	0.853674	1	-	-	-	-	-
21. Head/neck AIS	0.0753615	0.0739919	0.098423	0.293999	0.259601	0.277839	0.266458	0.292915	0.297598	0.192638	0.282668	0.181845	0.434206	0.214148	0.0399399	0.171516	0.172853	0.517324	0.336486	0.484952	1	-	-	-	-
22. Basilar fracture	0.0849255	0.0865541	0.219947	0.21538	0.210526	0.192611	0.178269	0.12659	0.131418	0.153162	0.145968	0.199803	0.0584513	0.125604	0.0262827	0.154603	0.0139493	0.0867289	0.119407	0.15772	0.167737	1	-	-	-
23. Calvarial fracture	0.18909	0.0708218	0.230434	0.274463	0.233302	0.217308	0.205476	0.155682	0.157452	0.131067	0.14625	0.359904	0.110529	0.236147	0.0764642	0.248156	0.0329058	0.156894	0.190216	0.279411	0.280148	0.392162	1	-	-
24. Facial fracture	0.0697673	0.203047	0.236829	0.0784791	0.09775	0.0897418	0.0713778	0.0349842	0.0371049	0.0849557	0.0882138	0.0795241	0.105356	0.0243492	0.0238127	0.0731476	0.0177096	0.0731446	0.0406297	0.13204	0.0475992	0.253091	0.112203	1	-
25. Ethanol intoxication	0.193973	0.172415	0.248551	0.288048	0.283696	0.274502	0.2274	0.176318	0.181174	0.117329	0.119523	0.10154	0.0949116	0.128657	0.110356	0.292404	0.188913	0.147337	0.217363	0.175547	0.133969	0.215394	0.248775	0.0444129	1
The table shows the Cramer's V effect size of 25 categorical variables used as potential predictors of poor outcomes following TBI in univariable analysis. We applied different cutoff criteria depending on the minimum degrees of freedom, formatting “high” values in bold red and “medium” values in bold. The thresholds for each minimum degree of freedom are as follows, For df=1: medium > 0.30, high…
